# Supplementary material for: An index concentration method for suspended load monitoring in large rivers of the Amazonian foreland
Source: Copernicus journal article supplement (doi:10.5194/esurf-2018-93), 2019-01-21
Supplement: Supplementary file [file esurf-2018-93-AC2-supplement.pdf]

# Response to review of referee #1

William Santini, Benoît Camenen, Jérôme Le Coz, Philippe Vauchel and Jean-Michel Martinez

15/03/2019

We thank the referee#1 for her/his positive appraisal of our manuscript and thoughtful review: the suggestions of the referee will actually improve the manuscript.

We attached a marked version of the manuscript, highlighting all modifications in yellow.

Below we list the referee comments in italic font and our responses in regular font.

Sincerely,  
W. Santini et al.

## General Comments

*This manuscript by Santini et al. reports a novel method to link suspended sediment concentration averaged over a whole river channel depth (which is necessary for accurate sediment flux computation), to those (“index”) that could be measured at a single point - most commonly at the surface. This is an especially relevant issue for accurately estimating sediment fluxes in larger rivers - which usually display strong vertical gradients in suspended sediment concentration - especially in remote locations where sediment sampling throughout the whole cross-section is not always possible. The manuscript provides a method for a semi-empirical calibration (i.e. the estimate of the depth-integrated sediment concentration relies on fits of hydraulic-based laws to observed concentrations, while the relationship between depth-averaged and index concentration is empirical) of such relationships, which is shown to be location-dependent, and potentially variable with time across the hydrological year (based on a network of gauging stations located on the largest Amazon tributaries in Peru).*

*The manuscript is well-written, properly organised, and clearly of great interest to those interested in sedimentary dynamics in large systems or in estimating river suspended sediment fluxes, be it for basic research or for operational reasons. I just think that some readers might be lost - as I was - at some places in the current manuscript, and that it would benefit from further clarification. Comments in this direction are appended below.*

# Specific comments

---

## Introduction

---

- p. 3 - l. 4: *“thalweg” or simply “bottom”?*

Thank you for this suggestion. Yes, here “bottom” would be more appropriate than “thalweg”. The sentence was modified in the marked manuscript (p.3, l.8).

---

## Materials and Methods

---

- p. 9 - l. 9: *Is it “Hypothesis” or “Assumptions”?*

Some of the “assumptions” made in this subsection are further validated by the results. Thus, they can be considered as “hypothesis”. On the other hand, however, a part of the assumption cannot be validated with our data: for example, the negligible interaction between the sediment classes.

Hence, we changed “hypothesis” for “assumptions” in this subsection title (p.9, l.13).

---

## Results

---

- p. 11 - l. 24: *“regression slope” should be defined or specified, or better at least better linked to what is said elsewhere (I think it is “alpha”?), and p. 11 - l. 25: What is meant by “measured alpha”?*

Fig.2 shows the regressions obtained from the field measurements between an index concentration sampled close to the river surface and the cross-sectional average concentration measured with a point sampling method. Thus, the “measured  $\alpha$ ” refers to the ratio between index and average concentration (i.e. the total sediment concentration), calculated for each measurement, by contrast with the “predicted  $\alpha$ ” calculated with the model from hydraulic parameters (Eq. 15 and 17).

The regression slope corresponds indeed to a fit to the observed  $\alpha$ -values. We skip this term to avoid any confusion

In the marked ms, we rewrote the section 3.1.1 (p.12, l.4 to p.12, l.22).

Moreover, we rephrased the following sentences and captions to avoid a potentially inappropriate use of the word “measured”:

- **P.4, 1.24:** “the ratios  $\alpha = \langle C \rangle / C(z_\chi)$  observed at 8 gauging stations”
- **P.12, 1.4 and 10:** “The observed  $\alpha$ ”
- **P.16, 1.6:** “the  $P_\phi$  fitted on measured concentration profiles”
- **P.16, 1.23-24:** “the  $\beta_\phi$  inferred in this study from measured profiles of concentration, particle diameter and velocity”
- **P.17, 1.16:** “the observed  $\beta_\phi$ ”
- **Caption for figure 2:** “Observed ratios  $\alpha = \langle C \rangle / C(h)$ ”
- **Caption for figure 3:** “Observed ratios  $\alpha = \langle C \rangle / C(h)$ ”
- **Caption for figure 7:** “observed  $\alpha_s$  values”

---

- p. 12 - l. 28 to - p. 10 - l. 21: *That is already a whole lot of interpretation, not only results.*

We guess the referee means p.11, 1.28 to p.12, 1.21.

Yes, the section 3.1.1 contains some interpretation of the observed data. Indeed, the main interest of this section is to show that the ratio  $\alpha$  between index and average concentration depends on both the basin characteristics and the flow conditions. Moreover, the results in this section highlights the key challenge of providing a proper model of the PSD using a limited number of sediment classes, and validate the discrete approach proposed to model  $\alpha$ .

In order to ensure not to lose the reader, and to explain the usefulness of the hydraulic insight in this study, we would prefer to keep the section 3.1.1 where it is.

Note that we rephrased the section 3.1.1.

---

- p. 12 - l. 2: *Is there a reference for this statement about the delivery of “coarser elements” by the lowland tributaries?*

To our knowledge, no reference strictly supports the claim that the lowland provides sediments with a coarser grain size than does the central Andean source. This is an assumption based on our grain size data and on the Napo River sediment budget (Laraque et al., 2009; Armijos et al., 2013), which shows that the lowland area is the main sediment source in this basin.

Section 3.1.1. was rewritten in the revised ms.

- p. 12 - l. 5: Isn't BOR right at the Andean outlet, and therefore not influenced by lowland inputs?

The Upper Marañon River and the Santiago River form the Marañon River at BOR. The Santiago River originates in the Ecuadorian Andes, and crosses a piggyback basin before reaching the Marañon River. This area is a lowland area.

Section 3.1.1. was rewritten in the revised ms to take into account this remark: "The river incision of this secondary source, and/or the Ecuadorian Andes, could provide coarser elements than does the central Andean source and explain why the ratios  $\alpha$  are higher at BEL and REG than at the other sites."

---

- p. 12 - l. 7: This is not what I see in Fig. 3... Aren't the axes swapped? And is the color-coding right? The figure and the text sound contradictory, but I might be wrong.

According to referee #1 and #2 reports, Fig.3 is indeed quite difficult to read. We modified the figure in order to better detect the increase of  $\alpha = \langle C \rangle / C(h)$  with sand mass fraction  $X_s$ . The concentration measurement uncertainty and the shear stress variability during the hydrological cycle explain the observed dispersion.

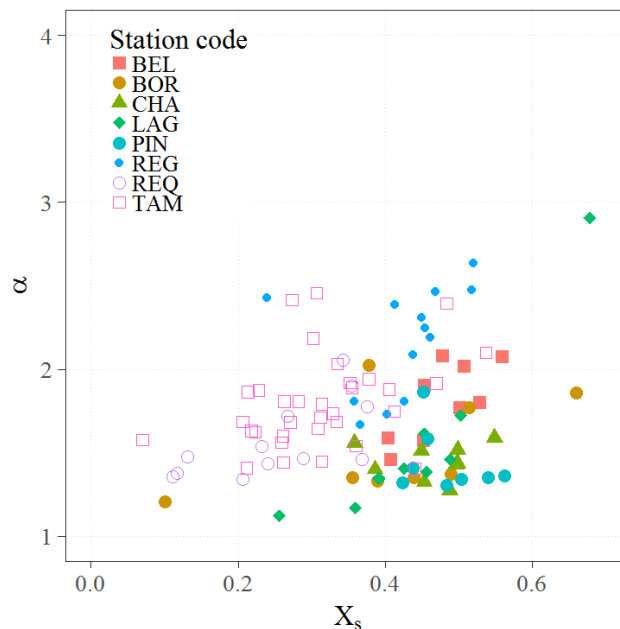

**New figure 3:** Observed ratios  $\alpha = \langle C \rangle / C(h)$  of total mean concentration to the total index concentration sampled at the water surface vs sand mass fraction  $X_s$ .

- p. 12 - l. 14: *“increases” with what? Downstream?*

We rephrased the sentence in the marked ms (p.12, l.29): “On the other hand, sand transport regime is capacity-limited, depending only on the available energy to route the sediments. Since the flow energy significantly decreases with the decreasing bed slope, sand total load is gradually decoupled from the washload in the floodplain, and the washload concentration is no longer a good proxy of the coarse particle concentration”

---

- p. 12 - l. 27: *“mixed-load” should be defined.*

The mixed-load is a transition mode of transport, where both bedload and suspended load contribute to the total load in similar proportion. The mixed load regime is found when  $\sim 1 < P_\phi < 6$ .

We skipped this term and the section 3.1.2 has been rephrased (p.13, l.10 – 15).

---

- p. 12 - l. 28: *“random factor” is not clear? Is it meant that this feature appears sort of stochastically?*

We agree with the reviewer that the sentence is unclear. We skipped this term in the revised ms, and the section 3.1.2 has been rephrased (p.13, l.10 – 15).

---

- p. 12 - l. 29-30: *Is this link clearly established, actually?*

Fig. 4 shows that one can easily observe vertical gradients for both the concentration and grain size. As a consequence, a proper modelling of this gradients would require a multi-class description of the sediment.

This section has been rephrased in the revised ms (p.13, l.12 – 13).

---

- p. 13 - l. 25-26: *Which “result” exactly are we talking about here? The P-values themselves or their low variability. Or the fact that they were averaged per site?*

We guess the referee means p.13, l.15-16.

We have rephrased the sentence in the revised ms: “this result” becomes “this low variability” (p.13, l.31).

---

- p. 14 - l. 22: Which “zone”?

This is the flow zone near the water surface. The sentence has been reworded in the marked manuscript in order to clarify the text (p.15, l.9).

---

## Discussion

---

- p. 16 - l. 29: Where are the numerical values in the equation from?

We have added in the revised ms (p.17, l.24 – 25) the following sentence: “[...] where the coefficient 3.1 comes from the Rose and Thorne law (2001). Other numerical values in Eq. (19) were fitted to obtain the best agreement with the  $\beta_\phi$  inferred from the measured concentration profiles (Table 2)”.

Moreover, we have rewritten (p.17, l.23) more clearly the equation 19 as:

$$\beta_\phi = 3.1 \exp \left[ -0.19 \times 10^{-3} \frac{u_*}{w_\phi} \left( \frac{h}{d_s} \right)^{0.6} \right] + 0.16, \quad (19)$$

---

- p. 19 - l. 9: Where does this relationship between “ $\langle u \rangle$ ” and “ $h$ ” come from?

Assuming the stream's velocity profile can be modeled by the logarithmic profile ( $u(z) = \frac{u_*}{\kappa} \ln \left( \frac{z}{z_0} \right)$ ), it can be shown that the depth-integrated velocity  $\langle u \rangle$  is approximatively equal to:  $\langle u \rangle \cong \frac{h}{e} \cong 0.37h$ :

$$\int_{z_0}^h \frac{u_*}{\kappa} \ln \left( \frac{z}{z_0} \right) dz \cong \frac{u_*}{\kappa} (\ln(h) - 1) - \frac{u_*}{\kappa} \ln(z_0) \cong \frac{u_*}{\kappa} \ln \left( \frac{h}{z_0} \right) = u \left( \frac{h}{e} \right), \text{ with } \ln(e) = 1 \text{ and } h \gg z_0$$

The sentence was rephrased in the revised ms (p.20, l.9).

---

## Figures

---

- Figure 2: It took me a while to understand what the blue and purple lines are in the upper-left panel - it would be better to clearly indicate what they are within the panel.

Please find below a new figure 2 with a short text in the upper left panel. This figure has been added to the revised ms.

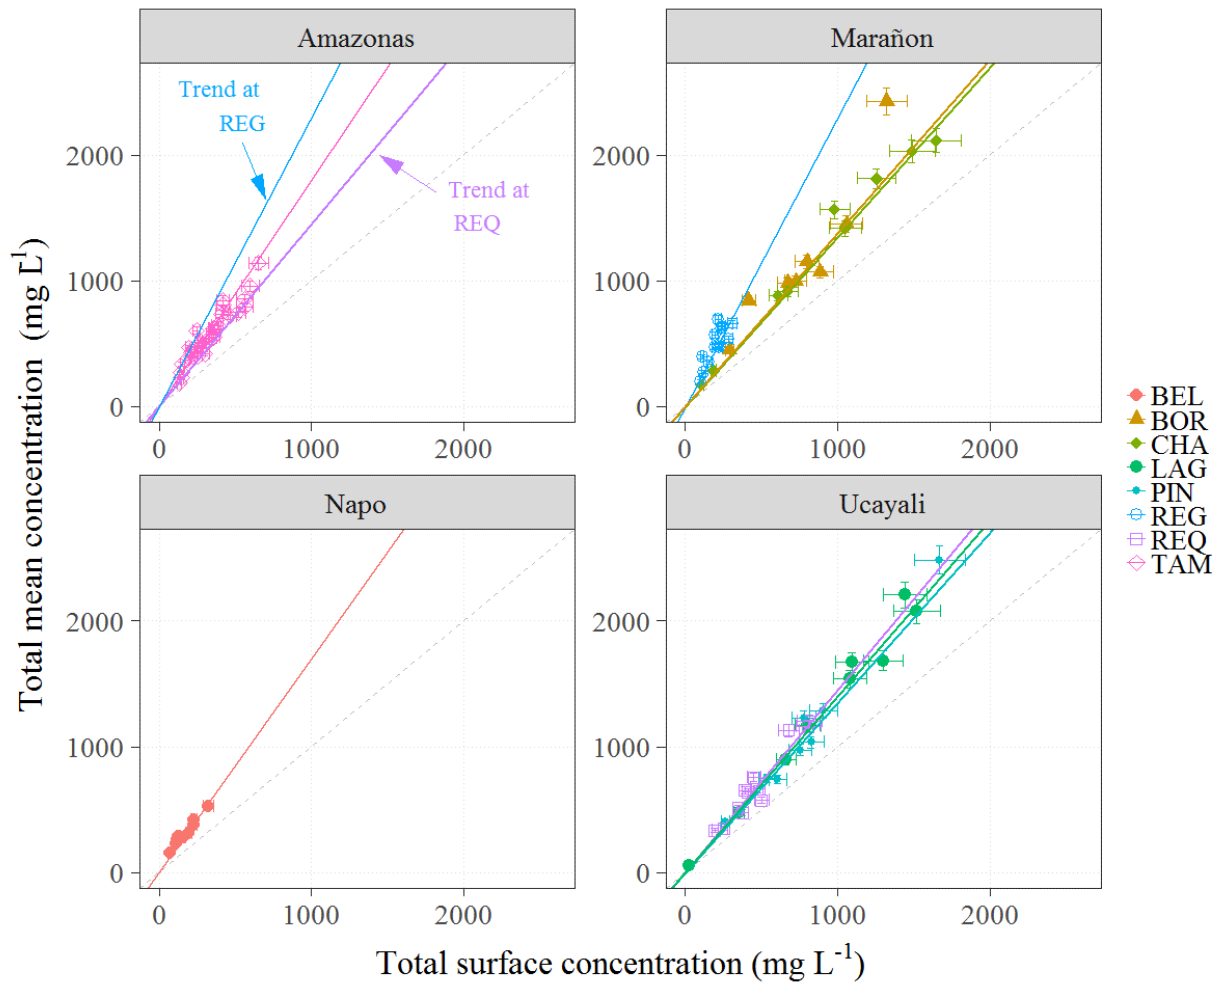

**New figure 2:** Observed ratios  $\alpha = \langle C \rangle / C(h)$  of total mean concentration to the total surface concentration, stacked by river basin, with trend lines. For the Amazonas River basin at TAM (upper-left panel), the REG and REQ trend lines were reported. Dashed lines: first bisector.

- What the x-axis represents is a bit mysterious, as I did not see any explanation in the text. I guess this is because this is a non-dimensional number that is expected to be the same at all locations and in all hydrological conditions?

**We guess it is the x-axis of Fig. 5 and not Fig. 2?** If it is Fig. 5, yes, it is a non-dimensional number, and yes, the diffusivity profile is expected to follow the theoretical models (Camenen & Larson, Rouse, Van Rijn or Zagustin) at all locations and in all hydrological conditions.

The caption for the figure 5 was modified: “Dimensionless sediment diffusivity coefficient derived from the measured concentration profiles”

- Figure 7, caption: What is meant by “observed” and “measured” values here?



For the ratios  $\alpha$ , all the terms “measured” were replaced by “observed” in the ms to avoid any confusion.

For each site, mean  $\alpha_f$  and  $\alpha_s$  were computed according to Eq. 17 with the mean parameters given in table 2. Then, “predicted  $\alpha$ ” were calculated from Eq. 15 ( $\alpha = X_f \alpha_f + X_s \alpha_s$ ), by considering the mean  $X_f$  and  $X_s$  values also given in table 2 and calculated from the concentration measurements. Finally, the “predicted  $\alpha$ ” are compared in Fig.7 with the “observed  $\alpha$ ”, i.e. the mean ratios between index and average total concentration, observed at each site.

- Figure 10: What about the other stations than those shown in panel (b), why aren't they represented? And it would make more sense to me to plot simply “predicted” vs. “measured” (i.e. without the 1.1-factor) and then to plot the 1:1, and/or 1.1:1 line – at least because in this case the caption is wrong, strictly speaking.

Samples for the characterization of the bed material PSD were collected only at four sites: BEL (2 PSD), REQ (1 PSD), REG (1 PSD) and TAM (2 PSD). Please note that for TAM and BEL, only the average diameter of the two PSD measured is plotted. There are no PSD measurements for the bed material at BOR, LAG, PIN and CHA.

P.6, 1.16-17, we improved the description in the revised ms about the collection of bed material in the “material and methods” section (p.6, 1.13 - 14).

Please find below the new figure 10 with the modification asked; this figure has been added to the revised ms.

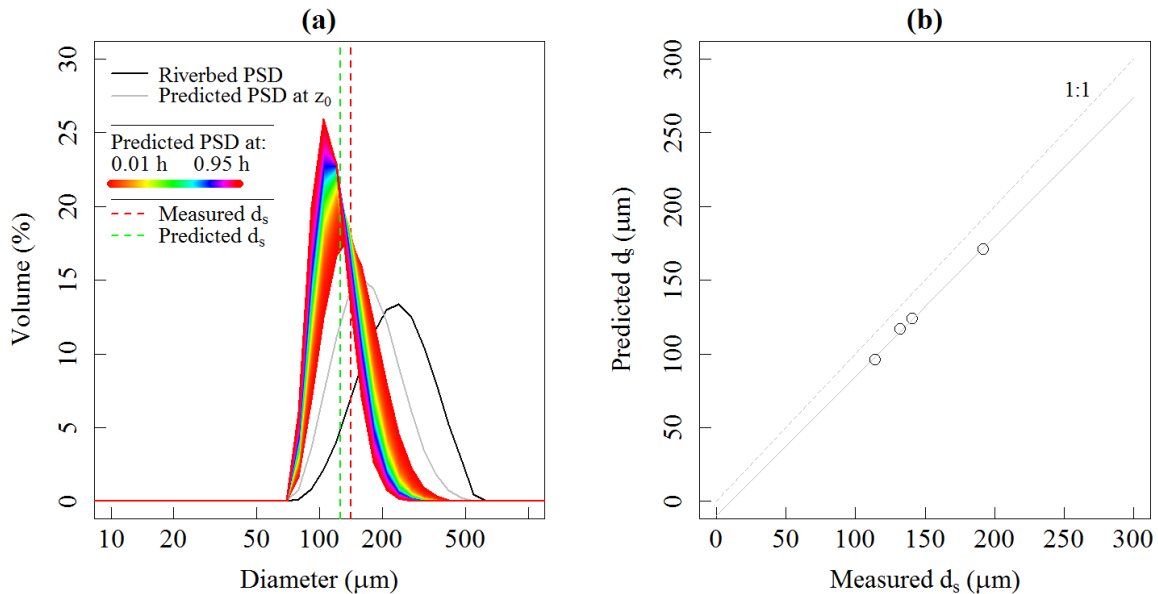

**Figure 10:** (a) Prediction of the mean diameter  $d_s$  at the TAM gauging station for  $u_* = 0.12 \text{ m s}^{-1}$  (mean flow conditions) (b) Predicted vs measured  $d_s$  at BEL, REQ, REG and TAM. Dashed line: first bisector. Continue line: best fit.

---

## Technical corrections

---

- p. 12 - l. 21 (also p. 15 - l. 3): “valid” -> “validate”.
- p. 14 - l. 17: “is” -> “are”.
- p. 17 - l. 5: “in” -> “at”.
- p. 20 - l. 5: *Something is missing between “can” and “more”.*
- p. 20 - l. 7: “the ratio of” -> “the ratio between”?
- p. 20 - l. 11: “ad” -> “and”.
- *Figure 2, caption: “staked” -> “stacked”.*

Many thanks for these corrections; we have revised all the corrections in the ms.

---

## Additional references:

---

Armijos, E., Laraque, A., Barba, S., Bourrel, L., Ceron, C., Lagane, C., Magat, P., Moquet, J. S., Pombosa, R., Sondag, F., Vauchel, P., Vera, A., Guyot, J. L.: Yields of suspended sediment and dissolved solids from the Andean basins of Ecuador, *Hydrological Sciences Journal*, 58(7), 1478-1494, doi:10.1080/02626667.2013.826359, 2013b.

# An index concentration method for suspended load monitoring in large rivers of the Amazonian foreland

William Santini<sup>1,2</sup>, Benoît Camenen<sup>3</sup>, Jérôme Le Coz<sup>3</sup>, Philippe Vauchel<sup>1,2</sup>, Jean-Loup Guyot<sup>1,2</sup>, Waldo Lavado<sup>4</sup>, Jorge Carranza<sup>4</sup>, Marco A. Paredes<sup>5</sup>, Jhonatan J. Pérez Arévalo<sup>5</sup>, Nore Arévalo<sup>6</sup>, Raul Espinoza Villar<sup>6,7</sup>, Frédéric Julien<sup>8</sup>, and Jean-Michel Martinez<sup>1,2</sup>

<sup>1</sup>IRD, Toulouse, 31400, France

<sup>2</sup>Laboratoire GET, CNRS, IRD, UPS, OMP, Toulouse, 31400, France

<sup>3</sup>IRSTEA, UR RIVERLY, Lyon-Villeurbanne, F-69625 Villeurbanne, France

<sup>4</sup>SENAMHI, Lima, Lima 11, Peru

10 <sup>5</sup>SENAMHI, Iquitos, Peru

<sup>6</sup>Facultad de Ingeniería Agrícola, UNALM, La Molina, Lima 12, Peru

<sup>7</sup>IGP, Ate, Lima 15012, Peru

<sup>8</sup>Laboratoire ECOLAB, CNRS, INPT, UPS, Toulouse, 31400, France

15 *Correspondence to:* William Santini (william.santini@ird.fr)

**Abstract.** Because increasing climatic variability and anthropic pressures have affected the sediment dynamics of large tropical rivers, long-term sediment concentration series have become crucial for understanding the related socio-economic and environmental impacts. For operational and cost rationalization purposes, index concentrations are often sampled in the flow and used as a surrogate of the cross-sectional average concentration. However, in large rivers where suspended sands are responsible for vertical concentration gradients, this index method can induce large uncertainties in the matter fluxes.

Assuming that physical laws describing the suspension of grains in turbulent flow are valid for large rivers, a simple formulation is derived to model the ratio ( $\alpha$ ) between **depth-average index and index average concentrations**. The model is validated using an exceptional dataset (1330 water samples, 249 concentration profiles, 88 particle size distributions (PSDs) and 494 discharge measurements) that was collected between 2010 and 2017 in the Amazonian foreland. The  $\alpha$  prediction requires the estimation of the Rouse number ( $P$ ), which summarizes the balance between the suspended particle settling and the turbulent lift, weighted by the ratio of sediment to eddy diffusivity ( $\beta$ ). Two particle size groups, **washload fine sediments** and sand, were considered to evaluate  $P$ . Discrepancies were observed between the evaluated and measured  $P$ , that were attributed to biases related to the settling and shear velocities estimations, but also to diffusivity ratios  $\beta \neq 1$ . An empirical expression taking into account these biases was then formulated to predict accurate estimates of  $\beta$ , then  $P$  ( $\Delta P = \pm 0.03$ ) and finally  $\alpha$ .

The proposed model is a powerful tool for optimizing the concentration sampling. It allows for detailed uncertainty analysis on the average concentration derived from an index method. Finally, this model **could likely** be coupled with remote sensing and hydrological modeling to serve as a step toward the development of an integrated approach for assessing sediment fluxes in poorly monitored basins.

## 1 Introduction

In recent decades, the Amazon basin has experienced an intensification in climatic variability (e.g. Gloor et al., 2013; Marengo et al., 2015), specifically in extreme events (drought and flood) as well as increasing anthropic pressure. In the Peruvian foreland, the advance of the pioneer fronts causes serious changes in land use, which are enhanced by the proliferation of roads that provide access to the natural resources hosted by this region. The number of hydropower projects is also rapidly increasing (e.g. Finer and Jenkins, 2012; Latrubesse et al., 2017; Forsberg et al., 2017). These global and local changes might increase the erosion rates in the basin as well as the suspended load inter-annual variability (e.g. Walling and Fang, 2003; Martinez et al., 2009). The sediment transfer dynamics might also be affected (e.g. Walling, 2006), generating large ecological impacts on the mega-diverse Amazonian biome and having socio-economic consequences on the riverine populations. In such a context, long-term and reliable sediment series are crucial for detecting, monitoring and understanding the related socio-economic and environmental impacts (e.g. Walling, 1983, 2006; Horowitz, 2003; Syvitski et al., 2005; Horowitz et al. 2015). However, there is a lack of consistent data available for this region, and this lack of data has prompted an increased interest in developing better spatiotemporal monitoring of sediment transport.

In the large tropical rivers of Peru, the measurement of cross-sectional average concentrations  $\langle C \rangle$  [ $\text{mg L}^{-1}$ ] remains a costly and time-consuming task. First, gauging stations can only be reached after several days of travelling on hard dirt roads or by the river. Second, there are no infrastructures on the rivers, and all operations are conducted using small boats under all flow conditions. Third, the gauging sections have depths that range from the metric to the decametric scale and widths that range from the hectometer to the kilometer scale. Such large sections experience pronounced sediment concentration gradients and grain size sorting, in both the vertical and the transverse directions (e.g. Curtis et al, 1979; Vanoni, 1979, 1980; Horowitz and Elrick, 1987; Filizola and Guyot, 2004; Filizola et al., 2010; Bouchez et al., 2011; Lupker et al., 2011; Armijos et al., 2013, 2016; Vauchel et al., 2017). The balance between the local hydrodynamic conditions and the sediment characteristics (e.g. grain size, density and shape) drive this spatial heterogeneity. Thus, the sand suspension is characterized by a high vertical gradient as well as a significant lateral variability and the concentration varies by several orders of magnitude; in contrast, the fine sediments (e.g. clays and silts) are transported homogeneously throughout the entire river section.

As a consequence, the entire cross-section must be explored to provide a representative estimate of the mean concentration of coarse particles. Thus, it is necessary to identify a trade-off between the need to sample an adequate number of verticals and points throughout the cross-section and the need for time-integrated or repeated measurements to ensure the temporal representativeness of each water sample (Gitto et al., 2017). The second-order moments of the Navier-Stokes equations induce this temporal concentration variability, as do the larger turbulent structures (typically those induced by the bedforms) and the changes in flow conditions (e.g. backwaters, floods, and flow pulses). Sands and coarse silts are much more sensitive to

velocity fluctuations than are clay particles (i.e., settling laws are highly sensitive to the diameter of the particles) and are the most difficult to accurately measure.

Depth-integrated or point-integrated sampling procedures are traditionally used to determine the mean concentration of suspended sediment in rivers. However, deploying these methods from a boat is rarely feasible due to the velocity and depth ranges that are encountered in large Amazonian rivers. For a point-integrated bottle sampling method, maintaining a position for a duration long enough to capture a representative water sample (Gitto et al., 2017) requires anchoring the boat and using a heavy ballast. This type of operation is very risky without good infrastructure and well-trained staff, especially when collecting measurements near the river's bottomthalweg. Moreover, this method decreases the number of samples that can be collected in one day.

For a depth-integrated sampling method within a deep river, the bottle may fill up before reaching the water surface if its transit speed is too slow. Moreover, if the ballast weight is not sufficient to hold the sampler nose in a horizontal position, the filling conditions are not isokinetic, and therefore, the sample will be non-representative.

Indirect surrogate technologies (e.g. laser diffraction technology or high-frequency acoustic instruments with multi-transducers) may also be used. These instruments provide access to the temporal variability in concentration or grain size; however, they have limited ranges, post-processing complexity (Gray and Gartner, 2010; Armijos et al., 2016), and higher maintenance costs due the fragility of the instruments.

Thus, sampling methods with instantaneous capture or short-term integration (< 30 s) are preferred. These methods follow a relevant grid of sample points (Xiaoqing, 2003, Filizola and Guyot, 2004; Bouchez et al., 2011; Armijos et al., 2013; Vauchel et al., 2017). The mean concentration  $\langle C \rangle$  [mg L<sup>-1</sup>] is determined by combining all samples into a single representative discharge-weighted concentration value, which is depth-integrated and cross-sectionally representative (Xiaoqing, 2003; Horowitz et al., 2015; Vauchel et al., 2017). In the present study, the spatial distribution of the concentration within the cross section is summarized into a single concentration profile that is assumed to be representative of the suspension regime along the river reach. The water depth  $h$  [m] becomes the mean cross-section depth, which is close to the hydraulic radius for large rivers. Therefore,  $\langle C \rangle$  will be hereafter defined as the depth-integration of this concentration profile  $C(z)$  ( $z$  [m] being the height above the bed), from a reference height  $z_0$  [m] just above the riverbed ( $z_0 \ll h$ ) to the free surface, and weighted by the depth-averaged velocity  $\langle u \rangle = \frac{1}{h} \int_{z_0}^h u(z) dz$  [m s<sup>-1</sup>]. [\(a term list may be found in the appendices\):](#)

$$\langle C \rangle = \frac{\int_{z_0}^h C(z) \times u(z) dz}{\int_{z_0}^h u(z) dz}, \quad (1)$$

However, to dampen the random uncertainties mainly related to the coarse sediments, this procedure requires taking a statistically significant number of samples throughout the cross-section, which is also time- and labor-intensive.

All these limitations preclude the application of such complete sampling procedures at a relevant time-step necessary to build up a detailed concentration series.

By analogy with the index velocity method for discharge computation (Levesque and Oberg, 2012), derived surrogate procedures, called index sampling methods (Xiaoqing, 2003), are thus preferred. One or a few “index samples” are taken as proxies of  $\langle C \rangle$ , usually at the water surface (e.g. Filizola and Guyot, 2004; Bouchez et al., 2011; Vauchel 2017). The index concentration monitoring frequency is then scheduled to suit the river’s hydrological behavior and minimize the random uncertainties on the measured index concentration  $C(z_\chi)$  [ $\text{mg L}^{-1}$ ] (Duvert et al., 2011; Horowitz et al., 2015).

The index concentration method first requires a robust site-specific calibration between the two concentrations of interest,  $\langle C \rangle$  and  $C(z_\chi)$ , i.e., for all hydrological conditions, which cannot always be achieved under field conditions. Such relations are usually expressed with the following linear form (e.g. Filizola, 2003; Guyot et al. 2005, 2007; Espinoza-Villar et al., 2012; Vauchel et al., 2017):

$$\langle C \rangle = \alpha C(z_\chi) + \xi, \quad (2)$$

where the regression slope  $\alpha$  and the intercept  $\xi$  are the fitted parameters of the empirical model. In this study, the intercept will be assumed to be zero ( $\xi = 0$ ).

The dispersion and the extrapolation of the  $\alpha = \langle C \rangle / C(z_\chi)$  may induce substantial uncertainties in the matter fluxes (Vauchel et al., 2017). Most of this uncertainty is attributable to  $C(z_\chi)$  (Gitto et al., 2017), particularly when only a single index sample is taken or when a unique sample position is considered. Indeed, the relation may change around this position based on the flow conditions.

The index sample representativeness becomes crucial as high-resolution imagery is increasingly used to link remote sensing reflectance data with suspended sediment concentration (e.g. Mertes et al., 1993; Martinez et al. 2009; 2015, Espinoza-Villar et al., 2012, 2013, 2017; Park and Latrubesse, 2014; Dos Santos et al., 2017). These advanced techniques finally provide a spatially averaged  $C(z_\chi)$  value for the finest grain sizes at the water surface of a reach (Pinet et al., 2017), which must be correlated with the total mean concentration transported in the reach of interest (i.e., including the sand fraction when possible) to be a quantitative measurement (Horowitz et al., 2015). Hence, to improve our knowledge of the sediment delivery problem (Walling, 1983), these empirical relations deserve hydraulic-based understanding.

In this study, the ratios  $\alpha = \langle C \rangle / C(z_\chi)$  measured-observed at 8 gauging stations in the Amazonian foreland were analyzed to identify the main parameters that controlled their variability.

Assuming that the shape of the concentration profiles measured in large Amazonian rivers can be well described using a physically based model for sediment suspension, the possibility of deriving a simple formulation for the ratio  $\alpha$  using this model was investigated.

This assumption is supported by previous studies that specifically showed that the Rouse model (Rouse, 1937) can well describe the suspension of sediments in large tropical rivers (Vanoni, 1979, 1980; Bouchez et al., 2011; Lupker et al., 2011; Armijos et al., 2016). However, the Rouse model predicts a concentration of zero at the water surface, which is where the

index concentration is often sampled. To find an alternative, other formulations (Zagustin, 1968; Van Rijn, 1984; Camenen and Larson, 2008) are compared to the data.

Then, the relevance of the derived model in terms of developing a detailed and reliable sediment flux series with an index method is discussed; specifically, the ability to accurately estimate the model parameters is evaluated. Finally, 5 recommendations for the optimized collection of index samples from large Amazonian rivers are inferred from the proposed model.

## 2 Materials and methods

### 2.1 Hydrological data acquisition

The hydrological data presented here were collected within the international framework of the Critical Zone Observatory 10 HYBAM (Hydrology of the Amazon Watershed), which is a long-term monitoring program. A Franco-Peruvian team from the IRD (Institut de Recherche pour le Développement) and the SENAMHI (SERvicio NAcional de Meteorología e HIDrología) operates the 8 gauging stations of the HYBAM hydrological network in Peru; of these, 4 stations control the Andean piedmonts fluxes, and 4 stations control the lowlands (Fig. 1). The three major Peruvian tributaries of the Amazonas (Solimões) River, i.e., the Ucayali River, the Marañon River and the Napo River, are monitored. The studied sites cover drainage areas ranging 15 from approximately 22,000 km<sup>2</sup> to 720,000 km<sup>2</sup> and have mean discharges ranging from 2,100 m<sup>3</sup> s<sup>-1</sup> to 30,300 m<sup>3</sup> s<sup>-1</sup> (Table 1). These large tropical rivers have flows with gradually varied conditions, unimodal and diffusive flood waves (except for the Napo River), and subcritical conditions, which enable backwater effects (Dunne et al., 1998; Trigg et al., 2009).

The Amazonian foreland in Peru has a humid tropical regime (Guyot et al., 2007; Armijos et al., 2013), and large amounts of runoff are produced during the austral summer. During the austral winter, the maximum continental rainfall is located to the 20 north of the equator, in line with the intertropical convergence zone (Garreaud et al., 2009). Thus, the numerous water supplies from the Ecuadorian sub-basins smooth the seasonality of the Marañon River flow regime. Located further to the south, the Ucayali basin experiences a pronounced dry season (Ronchail and Gallaire, 2006; Garreaud et al., 2009; Lavado et al., 2011; Santini et al., 2014).

The El Niño Southern Oscillation (ENSO) might alter these dynamics, as there are severe low-flow events in El Niño years 25 and heavy rainfall events in La Niña years (Aceituno, 1988; Ronchail et al., 2002; Garreaud et al., 2009). These events affect seriously the sediment routing processes (e.g. Aalto et al., 2003), as other extreme events unrelated to the ENSO (e.g. Molina-Carpio et al., 2017).

#### 2.1.1 Sampling strategy

For the reasons outlined in the Introduction, local observers monitor surface index concentrations at each station following a 30 hydrology-based scheme. The sampling depth is typically 20-50 cm below the water surface. The samples are taken in the mainstream and at a fixed position. Additionally, HYBAM routinely uses moderate-resolution MODIS images to determine

surface concentrations, and these values are calibrated with in situ radiometric measurements (Espinoza-Villar et al., 2012; Santini et al, 2014; Martinez et al.; 2015).

For calibration purposes (i.e., water level vs discharge and concentration index vs mean concentration), 44 campaigns were conducted during the 2010-2017 period. These campaigns included the collection of 494 discharge measurements, 249 sediment concentration profiles and 1330 water samples. The dataset covers contrasted regimes, including periods of extreme droughts (e.g. 2010) and periods of extreme floods (e.g. 2012, 2015) (Espinoza et al., 2012, 2013; Marengo et al., 2015). Thus, the sampled concentrations spanned a wide range (Table 1), which was well representative of the river hydrological variability. A 600 kHz Teledyne RDI Workhorse Acoustic Doppler Current Profiler (ADCP) was used and coupled with a 5 Hz GPS sensor to correct for the movable bed error (e.g. Callède et al., 2000; Vauchel et al., 2017).

A point sampling method was preferred to estimate  $\langle C \rangle$  (Filizola, 2003; Guyot et al., 2005; Vauchel et al., 2017) to capture the vertical concentration distribution. The sampling for concentration determination was usually performed at the following height ( $h$ ) from the bed:  $\sim 0.98 h$ ,  $0.75 h$ ,  $0.5 h$ ,  $0.25 h$ , sometimes at  $\sim 0.15 h$ , and finally at  $\sim 0.1 h$ , at three verticals that divided the cross-section according to the river width or the flow rate. Each vertical was assumed to be representative of the flow in the corresponding sub-section. Sampling was performed from a boat drifting on a streamline immediately after the ADCP measurements were collected. The sampler capacity was 650 mL, with a filling time of  $\sim 10$  seconds, which allowed for a short time integration along the streamline passing by the sample point. Considering the waves at the free surface, the boat's pitch and roll and the bedforms, the accuracy of the vertical position of the sampler may be evaluated as  $\pm 0.5$  m. This variability leads to substantial uncertainty in the zones with high concentration gradients. The operation time was approximately 2-5 hours, depending on the river sites. Steady conditions were observed during the sampling operation.

Finally, samples for the characterization of the bed material PSD were collected at four sites: BEL, REQ, RBG and TAM. The bed material was dragged on the riverbed.

### 2.1.2 Analytical methods

The concentrations  $C_\phi$  for two main grain size fractions  $\phi$  were further determined: the sand fraction ( $\phi = s$ ) was separated from the silt/clay fraction ( $\phi = f$ ) using a 63- $\mu\text{m}$  sieve (cf. Standart Methods ASTM D3977), according to the Wentworth (1922) grain size classification for non-cohesive particles. The water samples were filtered using 0.45- $\mu\text{m}$  cellulose acetate filters (Millipore) that were then dried at 50°C for 24 hours.

Particle size analysis was performed with a Horiba LA920-V2 laser diffraction sizer. The entire sampled volume was analyzed, with several repetitions demonstrating excellent analytical reproducibility. For each size group  $\phi$ , the arithmetic mean diameter  $d_\phi$  [m] was calculated:

$$d_\phi = \frac{\sum_i d_i x_i}{\sum_i x_i}, \quad (3)$$



where  $X_i$  is the relative content in the PSD for the class of diameter  $d_\phi$ . The settling velocities  $w_\phi$  corresponding to the diameters  $d_\phi$  derived from the PSD were computed using the Soulsby (1997) law, which assumed a particle density of  $2.65 \text{ g cm}^{-3}$ .

## 2.2 Theory for modeling vertical concentration profiles

- 5 Schmidt (1925) and O'Brien (1933) proposed a diffusion-convection equation to model the time-averaged vertical concentration distribution  $C_\phi(z)$  of grains settling with a velocity  $w_\phi$  [ $\text{m s}^{-1}$ ]. The grain size, shape and density are considered to be uniform. The equation is expressed as follows:

$$\varepsilon_\phi \frac{\partial C_\phi}{\partial z} = -w_\phi C_\phi, \quad (4)$$

- 10 where the term on the left side is the rate of upward concentration diffusion caused by turbulent mixing, balanced by the settling mass flux in the right term.  $\varepsilon_\phi$  [ $\text{m}^2 \text{ s}^{-1}$ ] is the sediment diffusivity coefficient that characterizes the particle exchange capacity for two eddies positioned on both sides of a horizontal fictitious plane.  $\varepsilon_\phi$  is assumed to be proportional to the momentum exchange coefficient  $\varepsilon_m$  [ $\text{m}^2 \text{ s}^{-1}$ ] (Rouse, 1937):

$$\frac{\varepsilon_\phi}{\varepsilon_m} = \beta_\phi, \quad (5)$$

- 15 ~~The where the~~  $\beta_\phi$  parameter is similar to the inverse of a turbulent Schmidt number (Graf and Cellino, 2002; Camenen and Larson, 2008). It may be depth-averaged (Van Rijn, 1984) or considered to be independent of the height above the bed (Rose and Thorne, 2001).

- The main issue of the Schmidt-O'Brien formulation (Eq. (4)) is the expression of the vertical distribution of the sediment mass diffusivity  $\varepsilon_\phi$ . Once this term is modeled (models are given hereafter), Eq. (4) is depth-integrated from the reference height  $z_0$  to the free surface to obtain the expression of the concentration distribution along the water column. The concentration  $C_\phi(z_0)$  is then required to determine the magnitude of the profile and can be evaluated using a bedload transport equation (e.g. Van Rijn, 1984; Camenen and Larson, 2008) or measured directly. However, in the case of a sampling operation, the large concentration gradient observed near the riverbed would force the operator to sample water at the reference height  $z_0$  with a very high precision to minimize uncertainties; however, achieving such a high level of precision is rarely possible. Hence, it is preferable to choose a more reliable reference concentration in the interval  $z = [z_0, h]$ . Thus, the following formulae   
 25 resulting from Eq. (4) are written using  $C_\phi(z_\chi)$  instead of  $C_\phi(z_0)$  as reference.

Building on Prandtl's concept of mixing length distribution, O'Brien (1933) and Rouse (1937) expressed the sediment diffusion profile with the following parabolic form:

$$\varepsilon_\phi(z) = \beta_\phi \kappa u_* z \left(1 - \frac{z}{h}\right), \quad (6)$$

where  $\kappa$  is the Von Kármán constant, and  $u_*$  [ $\text{m s}^{-1}$ ] is the shear velocity.

This expression leads to the classic Rouse equation (Rouse, 1937) for suspended concentration profiles. For  $z_\chi \in [z_0, h]$ :

$$\frac{c_\phi(z)}{c_\phi(z_\chi)} = \left( \frac{z_\chi}{z} \times \frac{h-z}{h-z_\chi} \right)^{P_\phi}, \quad (7)$$

where  $P_\phi = w_\phi / \beta_\phi \kappa u_*$  is the Rouse suspension parameter, i.e., the ratio between the upward turbulence forces and the downward gravity forces.  $P_\phi$  is the shape factor for the concentration profile.

5 The Rouse formulation is widely used in open channels and well suits the observed profiles in the Amazon River (Vanoni, 1979, 1980; Bouchez et al., 2011; Armijos et al., 2016). However, the Rouse formulation predicts a concentration of zero at the water surface.

Three other simple models for which  $C_\phi(h) \neq 0$  have been selected in this work to overcome this problem, i.e., the Zagustin (1968), Van Rijn (1984) and Camenen and Larson (2008) models.

10 Zagustin (1968) proposed a formulation for the eddy diffusivity distribution based on experimental measurements and a defect law for the velocity distribution.

The following variable changes were introduced:  $Z = \sqrt{(h-z)/z}$ , and the sediment diffusivity formulation proposed by Zagustin (1968) is:

$$\varepsilon_\phi(Z) = \beta_\phi \frac{\kappa}{3} u_* h Z (1 - Z^2)^3, \quad (8)$$

15 which leads to an expression with a finite value at the water surface:

$$\begin{cases} \frac{c_\phi(z)}{c_\phi(z_\chi)} = \exp\left(P_\phi (\Phi(z_\chi) - \Phi(z))\right) \\ \Phi = \frac{1}{2} \ln\left(\frac{(z^3+1)(z-1)^3}{(z^3-1)(z+1)^3}\right) + \sqrt{3} \arctan\left(\frac{\sqrt{3}Z}{Z^2-1}\right) \end{cases}, \quad (9)$$

As the proposed diffusivity profile is slightly different from the parabolic form, this expression leads to  $P_\phi$  values that are approximately 7% lower than those obtained with the Rouse theory (Zagustin, 1968).

20 Van Rijn (1984) proposed a parabolic-constant distribution for sediment diffusivity, i.e., a parabolic profile in the lower half of the flow depth (Eq. (6)) and a constant value in the upper half of the flow depth (Eq. (10)), which corresponds to the maximum diffusivity predicted by the Prandtl-Von Kármán theories. Indeed, some authors have reported measurements with constant sediment diffusivity in the upper layers (Coleman, 1970; Rose and Thorne, 2001).

$$\varepsilon_\phi(z \geq 0.5 h) = \frac{\beta_\phi}{4} \kappa u_* h, \quad (10)$$

For  $z \geq 0.5 h$ , the concentration profile is therefore exponential, with a finite value at the free surface:

$$25 \frac{c_\phi(z)}{c_\phi(z_\chi)} = \left( \frac{z_\chi}{h-z_\chi} \right)^{P_\phi} \exp\left(-4 P \left( \frac{z}{h} - \frac{1}{2} \right)\right), \quad (11)$$

In addition, Van Rijn (1984) introduced a coefficient to account for the dampening of the fluid turbulence by the sediment particles. This coefficient value is equal to the unity if the sediment diffusion  $\varepsilon_\phi$  distribution is concentration-independent, which was an assumption used in the present work because of the range of concentration measured in the Amazonian lowland rivers (Table D), and discussed further in section 4.1.

- 5 Camenen and Larson (2008) showed that the depth-averaged sediment diffusivity  $\varepsilon_\phi = \frac{\beta_\phi}{6} \kappa u_* h$  is a reasonable approximation of the Prandtl-Von Kármán parabolic form (Eq. (6)) that does not significantly affect the prediction of the concentration profiles in large rivers ( $P_\phi < 1$ ), except near the boundaries. This simple expression for  $\varepsilon_\phi$  lead to an exponential sediment concentration profile:

$$\frac{c_\phi(z)}{c_\phi(z_\chi)} = \exp\left(\frac{6 P_\phi}{h} (z_\chi - z)\right), \quad (12)$$

- 10 This profile has practical interest: there is no need to define the reference level  $z_0$  accurately or estimate the corresponding concentration  $C_0$  (Camenen and Larson, 2008).

### 2.3 A general expression for the ratio $\alpha$

#### 2.3.1 Assumptions and formalism

- $C_\phi(z)$  can be expressed by each of the models presented in this section (Eqs. (7), (9), (12)) and replaced into Eq. (1) to calculate  $\langle C_\phi \rangle$ . Then, the development of the expression  $\alpha_\phi = \langle C_\phi \rangle / C_\phi(z_\chi)$  would lead to the following equation, which is similar to Eq. (2), where the parameters driving  $\alpha_\phi$  are identified:

$$\frac{\langle C_\phi \rangle}{c_\phi(z_\chi)} = \alpha_\phi \left( \frac{z_0}{h}, \frac{z_\chi}{h}, P_\phi, u_*, h, P_\phi, \left( \frac{d_\phi}{h}, \beta_\phi, u_* \right), u_* \left( \frac{h}{z_0}, u_* \right) \right), \quad (13)$$

- However, the PSDs observed in large rivers are rather broad (e.g. Bouchez et al., 2011; Lupker et al., 2011; Armijos et al., 2016) and may be binned in a range of  $n$  grain size fractions  $\phi$ , as modeling the concentration profiles requires the diameter of sediment in suspension  $d_\phi$  to be almost constant throughout the water depth if there is not a narrow PSD. Assuming that the interaction between sediment classes  $\phi$  is negligible, it is possible to apply Eq. (7) and use a multiclass configuration to describe the PSD:

$$\alpha = \sum_{\phi=1}^n \alpha_\phi X_\phi, \quad (14)$$

- 25 where  $X_\phi$  is the mass fraction of each grain size fraction measured for the index sample with the concentration  $C_\phi(z_\chi)$  ( $\sum_{i=1}^n X_\phi = 1$ ). Moreover, it can be shown that the weight of the velocity distribution on the depth-averaged concentration

may be neglected in Eq. (1) when the suspension occurs throughout water column, i.e. when  $P_\phi < 0.6$ . Thus, if  $P_\phi < 0.6$ , it is possible to express  $\alpha_\phi(z_0/h, z_\chi/h, P_\phi)$ .

A key issue is then to provide a proper model of the PSD using a limited number of sediment classes. In this study, the available dataset provides concentrations for fine particles ( $0.45 < d_f < 63 \mu\text{m}$ ) and sand particles ( $d_s \geq 63 \mu\text{m}$ ). Then, the ratio  $\alpha$  may be formalized as follows:

$$\alpha = X_f \alpha_f + X_s \alpha_s, \quad (15)$$

Thus, if at height  $z_\chi$  the mass fraction of each group is accurately known after sieving,  $\alpha$  may be calculated for the whole PSD.

### 2.3.2 Model proposed for the ratio $\alpha_\phi$ prediction in Amazonian large rivers

The depth-integration of the Camenen and Larson formulation (Eq. (12)) is considered a reasonable approximation of the measured  $\langle C \rangle$  in large rivers (Camenen and Larson, 2008), with a simple expression that is independent of the  $z_0$  term, which differs from the other theories presented above.

Moreover, in the next section, the fit of the suspension models to the measured concentration profiles will show that the Zagustin model provides the best fit to the observations, particularly in the upper layer of the flow.

Thus, in this work,  $C_\phi(z_\chi)$  will be expressed with the Zagustin model (Eq. (9)), and  $\langle C \rangle$  will be expressed with the Camenen and Larson model.

Because the Zagustin model causes the Rouse number ( $P'_\phi$ ) to be slightly smaller than that calculated with the Rouse model ( $P'_\phi \approx 0.93 P_\phi$ , according to Zagustin, 1968), we obtain the following expression for predicting the ratio  $\alpha_\phi$ :

$$\alpha_\phi(z_\chi, P_\phi) = \frac{\exp\left(6 P_\phi \frac{z_\chi}{h}\right) (1 - \exp(-6 P_\phi))}{6 P_\phi \exp\left(0.93 P_\phi (\Phi(z_r) - \Phi(z_\chi))\right)}, \quad (16)$$

where  $z_r$  is a reference height required for expressing  $C_\phi(z_\chi)$  with the Zagustin model ( $z_r$  replaces  $z_\chi$  in Eq.(9)). Taking  $z_r = 0.5 h$ , the previous expression is simplified:

$$\alpha_\phi(z_\chi, P_\phi) = \frac{\exp(3 P_\phi) (1 - \exp(-6 P_\phi))}{6 P_\phi \exp\left(0.93 P_\phi \left(\Phi\left(\frac{h}{2}\right) - \Phi(z_\chi)\right)\right)}, \quad (17)$$

Nevertheless, other formulations might be inferred from the suspension models. For instance, the Camenen and Larson formulation could be alternatively used to model  $C_\phi(z_\chi)$  in the central region of the flow  $[0.2 h, 0.8 h]$ , which leads to a simpler expression:

$$\alpha_\phi(z_\chi, P_\phi) = \frac{1}{6 P_\phi} \exp\left(6 P_\phi \frac{z_\chi}{h}\right) (1 - \exp(-6 P_\phi)), \quad (18)$$

## 2.4 Model fitting strategy

To obtain a reach-scale profile, the fit to the concentrations averaged at each normalized depth  $z/h$  was assessed. It was assumed that the energy gradient, the mean bed roughness factor and the mean diameter did not significantly change from one sub-section to another, even if the point-to-point variability was high (Yen, 2002). Thus, the depth becomes the main factor influencing the  $P_\phi$  in the transverse direction. In the cross-sections studied here, the variation in depth from one vertical to the next was not sufficient to influence significantly the Rouse number.  $C_\phi(z_\chi)$  is then the average of several representative samples taken across the river width at the same relative height ( $z_\chi/h$ ).

After the first data cleaning of the sampled points, a robust and iteratively re-weighted least squares regression technique was used to minimize the influence of the outlier values. The weight values ( $W$ ) between  $z_0$  and  $h$  were assigned with the following parabolic function, similar to the eddy diffusivity expression (Eq. (6)):  $W(z) = z(1 - z)$ . Thus, the half-depth point, where the mixing term is the highest, has the largest influence.

Based on the ADCP velocity profile measurements, the parameter  $z_0$  was fixed at  $z_0 = 10^{-3} h$ . Indeed, when  $z_0 < 10^{-2} h$ ,  $\langle C \rangle$  is no longer sensitive to  $z_0$  (Eq. (1)), even if the Rouse number is not accurately known (Van Rijn, 1984). Hence,  $(h - z_0)/(z - z_0) \approx z/h$  can be assumed when considering reach-scale flow conditions.

## 2.5 Shear velocity estimation from ADCP transects

The velocity transects measured with an Acoustic Doppler Current Profiler (ADCP) were used to estimate the shear velocities  $u_*$  from the vertical velocity gradient through the fit of the logarithmic inner law (e.g. Sime et al, 2007; Gualtieri et al., 2018). Before the fitting procedure, the velocity profiles were averaged over a spanwise length of 60 m around each concentration profile position. To obtain representative velocity profiles, and to derive robust  $u_*$  values from these profiles, about 30 ADCP “ensembles” (i.e. measurement verticals of velocity) were required, corresponding to a spatial average of about 40 to 70 m in the cross-sectional direction. This was consistent with the methodology applied by Armijos et al. (2016) (50-60 ensembles, corresponding to 10% of the total width of the section) or Lupker et al. (2011) (30 ensembles, 40 to 70 m). Following these findings, the velocity profiles were averaged over a spanwise length of about 60 m around each concentration profile position. Then, an average of the fitted shear velocities was calculated for each ADCP measurement. The flow over the first 30 m from the riverbanks have been neglected, given the low velocities and the depths in this small area of the cross-section.

Furthermore, the imprecise knowledge of the exact bed elevation, the side lobe interferences, the beam angle, which induces a large measurement area, and the instrument’s pitch and roll all cause the ADCP velocity data to be inaccurate in the inner flow region (i.e. the region of the flow under bed influence  $\sim [z_0, 0.2 h]$ ). However, a fit over the entire height of the measured velocity ( $\sim 0.06 h$  to the ADCP “blanking depth” plus the transducer depth) leads to more robust shear velocity values. For that reason, the shear velocities were assessed in the zone between  $0.1 h$  and  $0.85 h$ .

### 3 Results

#### 3.1 Data analysis

##### 3.1.1 Index concentration relations calibrated for surface index samples

The observed  $\alpha$  ratios for total concentration (i.e., concentration including fine particles and sands) were calculated for a surface index using each field measurement carried out (Fig. 2). Empirical relationships for estimating the total mean concentration from the surface index samples (Eq. (2)) were calibrated using these data. The  $\alpha$  ratios observed at the three stations monitoring the Ucayali basin fluxes (i.e., LAG, PIN, and REQ) are similar ( $1.3 < \alpha < 1.5$ ) (Fig. 2). At BEL (Napo River), the  $\alpha$  values observed are higher ( $\alpha \cong 1.7$ ). On the other hand, different trends with larger scatter are observed in the Marañon basin. The  $\alpha$  ratios observed at REG ( $\alpha \cong 2.3$ , ~~alpha approx~~) are higher than those at BOR ( $\alpha \cong 1.5$ ) and CHA ( $\alpha \cong 1.4$ ), which are similar to that at LAG, PIN and REQ (Ucayali basin). However, the observed  $\alpha$  values at BOR fluctuate between two main trends, which are represented by the CHA-LAG-PIN-REQ group and the BEL-REG group. At TAM, similarly, the  $\alpha$  values rather follow the REG trend at low concentrations before evolving between the REQ and REG trends. This variability suggests that the  $\alpha$  ratio is site-dependent and potentially variable with the flow conditions. It could reflect differences in the basin characteristics (e.g. lithology and climate spatial distributions), then in sediment sources (e.g. mineralogy and PSD) and could relate to the sediment routing in the lowland. The first group (CHA-LAG-PIN-REQ) could be representative of a same source of sediments (the Central Andes), as few lateral inputs come swelling these rivers discharges in the lowland (Guyot et al., 2007; Armijos et al., 2013; Santini et al., 2014). Conversely, in the Marañon lowland, the Ecuadorian tributaries supply almost 55% of the water discharge and could significantly contribute to the river sediment load. The Napo River example (Laraque et al., 2009; Armijos et al., 2013) shows that the lowland part of the basin can be the main sediment source for these Ecuadorian tributaries. The river incision of this secondary source, and/or the Ecuadorian Andes, could provide coarser elements than does the central Andean source and explain why the ratios  $\alpha$  are higher at BEL and REG than at the other sites.

The concentration dataset highlights the control of the sand mass fraction  $X_s$  on the ratio  $\alpha$  (Fig. 3):  $\alpha$  increases with  $X_s$ . If finest particles of the PSD are dominant in the index concentrations  $C_x$  sampled in the upper layers of the flow, this washload is supply-limited, depending on the matter availability, rainfall upon the sources, and sediment entrainment processes occurring on the weathered hillslopes. Washload is then routed through the foreland without important mass fluctuations (e.g. Yuill and Gasparini, 2011). Significant exchanges between the floodplain and main channel lead to some dilution but also to some remobilization of the huge floodplain sediment stocks of the coarser elements that were previously deposited (e.g. clay aggregates, silts and fine sands). On the other hand, sand transport regime is capacity-limited, depending only on the available energy to route the sediments. Since the flow energy significantly decreases with the decreasing bed slope, sand suspended load is gradually decoupled from the washload in the floodplain, and the washload concentration is no longer a good proxy of the coarse particle concentration. The floodplain incision mechanically increases the sand mass fraction  $X_s$  in the suspended

load. Implicitly, the PSD mean diameter shifts with  $X_s$ , but it does not mean that there is any change in the physical properties (e.g. diameter, density and shape) of the sand fraction. This shift directly affects  $\alpha$ , as the vertical concentration gradient depends on the balance between the turbulence strength and the settling velocity (Eq. (4)). This result highlights the key challenge of providing a proper model of the PSD using a limited number of sediment classes, and **validate** the discrete approach proposed to model  $\alpha$ .

### 3.1.2 Particle size profiles

The measured **particle size distributions PSD** shows a multimodal pattern (Fig. 4a). This example of a global PSD that includes the entire particle size range was deconvoluted, assuming a mixture of lognormal sub-distributions (e.g. Masson et al., 2018). On the left side of the PSD, a weak lognormal mode was detected in the clay range, but it was negligible in comparison to the silt volume. **A fairly uniform fraction of fine sands ( $d_s \cong 80 \mu\text{m}$ ) that were transported in suspension throughout the water column with a nearly constant mode over depth was identified. This fraction approximately corresponds to the diameters less than the 10<sup>th</sup> percentile of the riverbed PSD. A second sand class ( $d_s \cong 200 \mu\text{m}$ ) is transported as graded suspension with a strong vertical gradient limited to the lower part of the water column ( $z/h < 0.2$ ). The Rouse number  $P_\phi$  varies from 1 to 6 for this class of sediments indicating that bedload may be non-negligible. However, no data exists to assess this argument.**

Concerning **the whole dataset of fine sediment mean diameters  $d_f$**  (Fig. 4b), no vertical gradient was observed for fine sediments, indicating there was homogeneous mixing throughout the water column, except near the air-water interface, where the calculated  $d_f$  tended to decrease. On the other hand, a gradient was observed for the sand fraction. Indeed,  $d_s$  varied from approximately 300 to 500  $\mu\text{m}$  near the bottom to 80 - 100  $\mu\text{m}$  near the surface. The increased **sand diameters  $d_s$**  in the bottom 0.2  $h$  of the water column may be explained by bed material inputs (see yellow distribution in Fig. 4a).

Nevertheless, modeling the PSD with two size groups, which were characterized by a diameter  $d_\phi$  that was almost constant throughout the water column, was reasonably suitable for the observed PSD, although two more classes (i.e., clay and bed material) could be considered to improve this model.

Thus, an average of the diameters derived from the PSD was calculated to summarize the PSD data into one single mean diameter  $d_\phi$  [m] per site for each size group  $\phi$ .

### 3.2 Suspension model suitability with the measured profiles

The suspension models (Eqs. 7, 9, 11, 12) were fitted to the concentration data to evaluate their suitability to the observed profiles. **The dataset confirmed that the Zagustin model causes the Rouse number ( $P'_\phi$ ) to be slightly smaller than that calculated with the Rouse model:  $P'_\phi \approx 0.93 P_\phi$ .**

The fitted  $P_\phi$  values showed low variability and were summarized by single average values per site, as shown in Table 2. This **low variability result** indicates **there is a dynamic equilibrium between the settling velocity  $w_\phi(d_\phi)$  and the shear velocity**

$u_*$  under nominal flow conditions, although some extreme values ( $P_\phi > 0.5$ ) were measured during severe drought events at the lowland stations.

The Rouse numbers obtained for the fine fraction reflect a suspension regime that is close to the ideal washload ( $P_f < 0.1, 1 \leq \alpha_f(h, P_f) \leq 1.5$ ). Additionally, regarding the Rouse numbers corresponding to the sand fraction, they reflect a well-developed suspension in the entire water column for the piedmont station group ( $0.2 < P_s < 0.3$ ) and for the lowland station group ( $0.35 < P_s < 0.45$ ), with a significant concentration gradient ( $2.3 \leq \alpha_s(h, P_s) \leq 7.5$ ).

Given the availability of a single mean value of  $w_\phi(d_\phi)$  per site and size group, single diffusivity ratio  $\beta_\phi = w_\phi/P_\phi\kappa u_*$  corresponding values were calculated considering a mean shear velocity per site (Table 2).

### 3.2.1 Sediment diffusivity profiles

The diffusivity profiles  $\varepsilon_\phi(z)$  were derived from the measured concentration profiles with the discrete form of Eq. (4). In order to accurately capture the small variations in  $\varepsilon_\phi$ , accurate sampling is key: This the calculation of  $\varepsilon_\phi$  requires accurate concentration and sampling height values, particularly for the fine fraction, which experiences low vertical concentration gradients.

Nevertheless, the overall shapes of the derived  $\varepsilon_\phi(z)$  profiles were in good agreement with the Rouse and Zagustin theories and were slightly closer to the second one (Fig. 5). Given the high scatter of the diffusivity values, Camenen and Larson's expression of depth-averaged diffusivity is a reasonable approximation, except near the bottom and top edges of the diffusivity profiles, where the data departs gradually from this model. However, the constant diffusivity value suggested by Van Rijn (1984) for the upper half of the water column clearly overestimates the diffusivity for  $z > 0.75 h$ .

The diffusivity around  $z = 0.75 h$  is, however, overestimated by all the models. The low concentrations near the water surface could result in an underestimation of the  $\varepsilon_\phi(z \approx 0.75 h)$  values calculated from the difference  $\Delta C_\phi = C_\phi(z \approx 0.5 h) - C_\phi(z \approx h)$  (Eq. (4)). Thus, detailed measurements are required in the upper layer of the flow to confirm the shapes of the  $\varepsilon_\phi(z)$  profiles in this zone where the water-air interface and the secondary currents can influence the turbulent mixing profiles.

### 3.2.2 Concentration profile suitability

Overall, the suspension models (Eqs. 7, 9, 11, 12) fit well with the observed profiles (Fig. 6): for 92% of the profiles fitted, the coefficient of correlation ( $r$ ) were superior to 0.9 and 100% of the  $r$  were superior to 0.7. In the measured concentration profiles with only a small relative error (Fig. 6), except near the edges where the highest discrepancies between the two exponential expressions (Van Rijn, 1984; Camenen and Larson, 2008) and the Rouse and Zagustin models appear.

The concentrations sampled at the bottom edge confirmed the general shape of the Zagustin and Rouse models, despite the uncertainties in the concentrations measured in this zone.

Near the water surface, the non-zero values predicted by the Zagustin model were often the closest to the observed concentrations.



The use of the Camenen and Larson model to calculate the mean concentration  $\langle C_\phi \rangle$  seems to be a reasonable approximation. Indeed, for the range of nominal Rouse numbers considered here ( $P_\phi < 0.6$ ), the bottom concentration gradient has little influence on  $\langle C_\phi \rangle$  because the velocity decreases rapidly with depth in this region of the flow ~~the velocity drops to zero in this zone~~. Moreover, the top-layer concentrations are too low to weight significantly on  $\langle C_\phi \rangle$ .

5 The comparison between the predicted and observed mean  $\alpha_\phi$  values per site and size group (Fig. 7a) allows for the validation of the general model proposed in this work (Eq. (17)). To show the model's ability to predict how  $\alpha_\phi$  changes with flow conditions at one specific site, this model was also compared with all the  $\alpha_\phi$  values measured-observed at the water surface and at mid-depth (Fig. 7a). The observations follow the model trend well, despite the high scatter of the  $\alpha_s(h, P_s)$  values, which is caused by the low diffusivity and concentration in coarse material near the water surface in this zone and by the uncertainty  
10 of the exact z-position of the samples. At mid-depth, the  $\alpha_s(0.5 h, P_s)$  values has lower scatter.

Nevertheless, the  $\alpha_s$  sensitivity to the Rouse number remains moderate for most of the hydraulic conditions encountered, except for the extremely low water-flow rates, i.e., when  $P_s > 0.5$ . The  $\alpha_f$  sensitivity to changes in flow conditions is very small-low. Then, considering the small ~~poor~~ contribution of the low waters to the sediment budget and the small Rouse number variations for the nominal hydraulic conditions at a specific site (Table 2), the use of the mean  $\alpha_\phi$  coefficients per site seems  
15 to be reasonable for assessing reliable sediment budgets.

Regarding the simplified model (Eq. (18)), a reasonable approximation is expected to be found in the central region of the flow, but the values gradually depart from the observations near the water surface and the riverbed.

Finally, the mean ratios  $\alpha(h)$  per site were computed (Eq. (15)) using the predicted mean  $\alpha_f(h, P_f)$  and  $\alpha_s(h, P_s)$  (Eq. (17)) and the mean mass fractions  $X_f$  and  $X_s$  measured at the water surface (Table 2). The observed vs. predicted  $\alpha$  ratios are in  
20 excellent agreement ( $r^2 = 0.97$ ) (Fig. 7b) and validate the prediction ability of the model when the Rouse numbers are accurately known.

#### 4 Discussion on the model applicability

The equations proposed in this work (Eqs. 17, 18) for modeling the ratios  $\alpha_\phi(z_\lambda, P_\phi)$  become ~~are~~ highly very sensitive when both the index sample is taken near the river surface ( $z_\lambda \approx h$ ) and the Rouse number is ~~fairly~~ rather large ( $P_\phi > 0.4$ ) (Fig. 7a).

25 This is a first limitation for the model applicability, if a monitoring of the index concentration at a deeper level on the water column is not technically feasible. In addition, for rivers with Rouse number greater than 0.6 (i.e. when the suspension does not occur on the entire water column because the particle are too coarse in comparison to the strength of the flow to be uplifted at the water surface), the weight of the velocity distribution in the model can no longer be neglected as it was in this work (see the assumption, section 2.3.1). Furthermore, the higher the Rouse number, the more the concentration measurement is difficult  
30 to perform. Then, the accuracy of the model depends also on the concentration measurement procedure chosen and related uncertainties. These uncertainties depends on the point-sampling integration-time which must be long enough to be

representative (Girro et al., 2017), on the volume of water collected, and on the sampling position(s) defined in the cross-section.

Therefore, estimating  $P_\phi$  with a low uncertainty is a key issue to predict accurate  $\alpha_\phi$  ratios during sediment concentration monitoring. This estimation can be achieved (1) through the estimation of the hydraulic parameter  $u_*$ ,  $w_\phi$  and  $\beta_\phi$ , or (2) empirically using detailed point concentration measurements. Then, if the Rouse number variability is significant during the hydrological cycle, the empirical relationship between  $u_*$  or  $h$  and the measured  $P_\phi$  fitted on measured concentration profiles may be calibrated.

#### 4.1 Estimation of the diffusivity ratio $\beta_\phi$

For many decades, studies based on flume experiments or measurements in natural rivers have shown that  $\beta_\phi$  usually departs from the unity. The sediment diffusivity increases ( $\beta_\phi > 1$ ) with bedforms or movable bed configurations (Graf and Cellino, 2002; Gualtieri et al., 2017); specifically, the boundary layer thickness tends to be thin just before the bedforms crest, and then it peels off at the leeward side (Engelund and Hansen, 1967; Bartholdy et al., 2010). This trend implies there are anisotropic macro-turbulent structures, with eddies that convect large amounts of sediments to the upper layers and settle further after eddy dissipation. Thus, bedforms locally modify the ratio between the laminar and turbulent stresses, inducing different lifting profile shapes in the inner region (e.g. Kazemi et al., 2017) and causing the mixing length theory to fail in the overlap region. Centrifugal forces driven by turbulent motion and applied on the grains could also enhance the particle exchange rate between eddies (Van Rijn, 1984).

Conversely, the suspension is dampened ( $\beta_\phi < 1$ ) when the large suspended particles do not fully respond to all velocity fluctuations, such as passive scalars.

Van Rijn (1984), Rose and Thorne (2001) and Camenen and Larson (2008) attempted to model  $\beta_\phi$  as a function of the ratio  $w_\phi/u_*$  for sand and silt particles. However, the measured  $\beta_\phi$  encompasses poorly understood physico-chemical processes as well as uncertainties and bias of the  $w_\phi$  and  $u_*$  estimations, which might partly explain the shifts along the  $w_\phi/u_*$  axis between the three pre-cited laws and the  $\beta_\phi$  measured-inferred in this study from measured profiles of concentration, particle diameter and velocity in this study (Fig. 8a).

With regard to  $w_\phi$ , a major difficulty comes from the need to divide the PSD into various size groups and to summarize each sub-distribution with a single characteristic diameter (e.g. mode, median, mean), and different values of  $w_\phi(d_\phi)$  are calculated according to the choices made.

The aggregation process is a supplementary complicating factor (Bouchez et al., 2011) but is probably not the main issue in these white rivers with little organic matter (Moquet et al., 2011; Martinez et al., 2015). Indeed, the results of Bouchez et al. (2011) are probably biased because the authors used a single diameter to summarize the entire PSD, which is highly sensitive

to the flow conditions. However, this bias would not concern the sand group because the shear modulus experienced in large Amazonian rivers would prevent the formation of large aggregates.

The choice of a settling law (e.g. Stokes; Zanke, 1977; Cheng, 1997; Soulsby, 1997; Ahrens, 2000; Jiménez and Madsen, 2003; Camenen, 2007) may also induce bias on  $w_\phi$ . In these laws, the sediment density is a key parameter that is often neglected, as natural rivers comprise a diversity of minerals with contrasting density ranges.

On the other hand, the shear velocity estimation also suffers from uncertainties in terms of the velocity measurements and biases that are induced by the method used (Sime et al, 2007).

For instance, the departures from logarithmic velocity profiles increase with the distance to the bed (e.g. Guo et Julien, 2008) in sediment-laden flows (e.g. Castro-Orgaz et al., 2012), which could be relevant to deep Amazonian rivers. Indeed, the mixing length expansion could reach a maximum before the water surface, as the energetic eddy size cannot expand *ad infinitum* far from the flow zone under the influence of bed roughness because of the increasing entropy. The log-law assumptions (i.e., constant shear velocity throughout the water column and mixing length approximation) would no longer be valid, and the velocity profiles would follow a defect law in the outer region. This raises the need to find a suitable model for the velocity distribution in large rivers, leading to an unbiased estimate of the shear velocity.

Thus, it is not surprising to find discrepancies between the empirical laws and the observations based on the experimental conditions. Here, the Rose and Thorne (2001) empirical law is the closest to the measured-observed  $\beta_\phi$  (Fig. 8a), with departures that seem to be a function of the water level.

We assume that a global correction of the different bias on the  $w_\phi/u_*$  term would depend on the flow depth as well as on the skin roughness, which partly influences the formation and expansion of the turbulence structures and thus influences the velocity distribution (Gaudio et al., 2010). Here,  $d_s$  is considered instead of the skin roughness height, as few riverbed PSDs are available and because it is a key parameter for the settling law. Thus, the following modification of the Rose and Thorne (2001) law is proposed:

$$\beta_\phi = 3.1 \exp \left[ -0.19 \times 10^{-3} \frac{u_*}{w_\phi} \left( \frac{h}{d_s} \right)^{0.6} \right] + 0.16 , \quad (19)$$

where the coefficient 3.1 comes from the Rose and Thorne law (2001). Other numerical values in Eq. (19) were fitted to obtain the best agreement with the  $\beta_\phi$  inferred from the measured concentration profiles (Table 2). In a similar way as Camenen & Larson (2008), a minimum  $\beta_\phi$  beta-value was found for very small values of  $w_\phi/u_*$ . This non-dimensional law, which extends below the range of  $w_\phi/u_*$  usually considered in previous studies, allows for an enhanced prediction of  $\beta_\phi (\pm 0.03)$  (Fig. 8).

Furthermore, the dataset did not show any relationship between concentration and the diffusivity ratio  $\beta_\phi$  (not shown here). The uncertainties in the dataset collected in field conditions do not allow to further investigate influence of secondary order factors on the diffusivity ratio, as the particle characteristics (shape, grain size, density...), the aggregation phenomenon, or the level of stratification of the flow (e.g. Van Rijn, 1984; Graf and Cellino, 2002; Pal and Ghoshal, 2016; Gualtieri et al. 2017).

Applying Eq. (19) to predict the mean  $\beta_\phi$  values per site, the predicted and fitted  $P_\phi$  are in good agreement (Fig. 9a), with little scatter when considering the uncertainties in the measured concentrations and therefore on the fitted  $P_\phi$ .

This result shows that the shear velocity rather than variations in particle size, mainly controls the Rouse number variability in a given site (Fig. 9b). The variations in particle size ( $d_\phi$  which was considered as a constant for all the hydrologic

5 conditions in the current study) are therefore a second order factor. The shear velocity is itself driven by the high amplitude of the water depth in Amazonian rivers (Fig. 9c), and it has hysteresis effects at the gauging stations located in the floodplain, which are attributed to the backwater slope variability in these subcritical flood wave contexts (Trigg et al., 2009). Hence, the accurate monitoring of the water level and knowledge of the river surface slope, even if limited or biased, would allow for an acceptable prediction of the Rouse numbers, which could be used to establish a single  $\beta_\phi$  value per site.

#### 10 4.2 Predicting $d_s$ from the riverbed PSD

For fine particles,  $d_f$  can be accurately measured in the water column because the fine particles are well mixed in the flow. Regarding the sand particles, such measurements induce uncertainties due to the particle fluctuations in the current and because the eddy structure development in the bottom layers of the flow swiftly causes strong grain size sorting (Fig. 4). The suspended sediment particles are thus considerably smaller than the bed load or riverbed particles (Van Rijn, 1984).

15 The diameter of the suspended sand can be assessed by taking a representative percentile of the riverbed PSD (e.g. Rose and Thorne, 2001). Alternatively, an empirical expression that considers the flow conditions was proposed by Van Rijn (1984). Here, the Camenen and Larson (2005) formulae for the estimation of reference concentration  $C_\phi(z_0)$  was applied in a multiclass way to the riverbed PSD, and it was assumed that the size fractions did not influence each other and there was a uniform sediment density for all grain sizes ( $2.65 \text{ g cm}^{-3}$ ). In this formulation,  $C_\phi(z_0)$  is a function of the dimensionless grain  
20 size  $d_*$ , the local Shields parameter  $\theta_\phi$  and of the critical Shields parameter  $\theta_{cr}$  for the inception of transport (Camenen et al., 2014):

$$C_\phi(z_0) = \frac{0.0015 \theta_\phi}{\exp\left(0.2 d_* + 4.5 \frac{\theta_{cr}}{\theta_\phi}\right)}, \quad (20)$$

This first PSD predicted at the transition level  $z_0$  is further diffused vertically with the Zagustin model (Eq. (9)), considering the Soulsby (1997) settling law in the  $P_\phi$  calculations. (Fig. 10a). The model underestimates the measured  $d_s$  by approximately

25 10% (Fig. 10b). This slight discrepancy might be explained by stochastic and ephemeral inputs of coarse bed material in the water column, which are not addressed by the suspension theory.

### 4.3 Sensitivity analysis and recommendations for optimized sampling procedures

The approximation error  $\Delta P_\phi$  can be evaluated at  $\pm 0.03$  (from Eq. (19), Fig. 9 or Table 2) and propagated to the corresponding  $\alpha_\phi(z_\chi, P_\phi \pm \Delta P_\phi)$  (Fig. 11a). The error on  $z_\chi$  is not considered here but would increase the  $\alpha_\phi$  sensitivity in the zones with a high concentration gradient.

5 Overall, the relative error on  $\alpha_\phi$  remains moderate for all the flow conditions experienced by the rivers studied here (i.e., below  $\pm 10\%$  in the central zone of the flow and below  $\pm 20\%$  at the water surface), except near the riverbed (Fig. 11a). Nevertheless, for operational applications, this result must be weighted by the relative error profile of the measured index concentrations  $\Delta C_\phi(z_\chi) / C_\phi(z_\chi)$ .

10 By substituting  $C_\phi(z_\chi)$  with the Zagustin model (Eq. (9)) and assuming  $\Delta C_\phi(0.5 h) / C_\phi(0.5 h) = \pm 10\%$ , it is possible to model this profile of concentration uncertainty (Fig. 11b) and to derive the relative uncertainty of  $\langle C_\phi \rangle$  according to the sampling height under various flow conditions (Fig. 11c).

15 Here, the considered uncertainty is a simple function of the concentration. However, coarse particles are more sensitive to current fluctuations than are fine sediments. Thus, the sand concentration uncertainty is underestimated, at least in the region of the flow under bed influence  $\sim [z_0, 0.2 h]$ , where stochastic uplifts of bed sediments impose high variability on the concentration.

Furthermore, the sampling frequency as well as the number of index samples taken and their positions are important parameters to consider. The section geometry, the velocity distribution and the transversal movable bed velocity pattern are important guidelines in the selection of a sampling position(s). The integration of the lateral variability of the concentration is not discussed here.

20 Nevertheless, when considering these assumptions, optimized sampling heights may be defined:

- For fine sediments ( $P_f < 0.1$ ), the most accurate  $\langle C_f \rangle$  is obtained when sampling the water column at approximately  $0.5 h$ . The sampling can also be achieved at the water surface with a good estimation of  $\langle C_f \rangle$  ( $\pm 15\%$ ).
- For the sand fraction at the piedmont stations ( $P_s < 0.3$ ), sampling in the  $[0.2 h, 0.8 h]$  region is recommended to keep the errors of  $\langle C_s \rangle$  below  $\pm 20\%$ . A sampling at the water surface is still possible, but there will be uncertainties between  $\pm 20\text{--}40\%$  for  $\langle C_s \rangle$ .
- For enhanced monitoring of the sand concentration at the lowland stations ( $P_s > 0.3$ ), the  $[0.2 h, 0.8 h]$  zone is preferred over the water surface, where the  $\alpha_\phi$  prediction would require very accurate estimations of  $P_s$  and  $C_s(h)$ .

25 The proposed  $\alpha_\phi$  models (Eqs. 17, 18) allow for achieving a routine protocol with sampling in the central zone of the flow: the  $\alpha_\phi$  can be predicted at each sampling time-step, when the section geometry is known and when the flow is sufficiently stable to estimate  $z_\chi/h$ . For instance, a single fixed sampling depth could be used.

30 Alternatively, the Rouse number can be estimated at each sampling time-step from Eq. (7) by sampling two heights  $z_{\chi_1}$  and  $z_{\chi_2}$  of the water column at each measurement time-step:

$$P_\phi = \frac{\ln\left(\frac{C_\phi(z_{\chi_1})}{C_\phi(z_{\chi_2})}\right)}{\ln\left(\frac{z_{\chi_2}(h-z_{\chi_1})}{z_{\chi_1}(h-z_{\chi_2})}\right)}, \quad (21)$$

For instance, the concentration at  $z_{\chi_1} = 0.7 h$  and the concentration at  $z_{\chi_2} = 0.3 h$  results in  $P_\phi = 0.59 \ln(C_\phi(0.3 h)/C_\phi(0.7 h))$ .

When considering nominal flow conditions ( $P_\phi < 0.6$ ), the sampling height above the riverbed  $h/e \approx 0.37 h$  ( $e$  being the Euler number) appears to be pertinent for simplified operations, as the ratios of  $\alpha_\phi(h/e, P_\phi)$  remain interestingly close to unity ( $\pm 10\%$ ) (Fig. 7a). Thus,  $\{\beta_f, \beta_s\} \approx \{0.16, 1\}$  could be simply assumed without inducing large errors in the  $\alpha_\phi(h/e, P_\phi)$  estimations. The particles are usually present in a significant amount, and the turbulent mixing is intense (Eq. (6)) while the concentration gradients are moderate, which also allow for more uncertainty regarding  $z_\chi$ . Interestingly, when considering the depth-averaged velocity  $\langle u \rangle \approx u(h/e)$  for velocity profiles that are logarithmic in nature, the sediment discharge on a vertical  $q_{s\phi}$  [g s<sup>-1</sup> m<sup>-2</sup>] may be expressed as follows:

$$q_{s\phi} = \alpha_\phi \times C_\phi \left(\frac{h}{e}\right) \times u \left(\frac{h}{e}\right) \approx C_\phi \left(\frac{h}{e}\right) \times \langle u \rangle \pm 10\%, \quad (22)$$

Finally, if sampling in the central zone of the flow is not technically feasible during concentration monitoring, the mean concentration of fine particles may be estimated with surface index sampling or remote sensing (Martinez et al., 2015; Pinet et al., 2017). Then, the sand concentration could be assessed with a sediment transport model that is suitable for large rivers (e.g. Molinas and Wu, 2001; Camenen and Larson, 2008). To parameterize such models, improved space-borne altimeters (e.g. the SWOT mission) and hydrological models are already serious alternatives to in situ discharge, water level and slope measurements (e.g. De Paiva et al., 2013; Paris et al., 2016).

## 5 Conclusion and perspectives

The use of measured concentration profiles with physically-based models describing the suspension of grains in turbulent flow has shown the possibility to derive a simple model for the prediction of  $\alpha_\phi$ , i.e., for a given particle size group  $\phi$ . A proper modeling of the PSD using two hydraulically consistent size groups (i.e., fine particles and sand) is first required to obtain a characteristic diameter that is mostly constant for each size group during the hydrological cycle.

The Zagustin profile, with finite values at the water surface, demonstrated the best suitability in relation to the observed data. Nevertheless, the Camenen and Larson model was in good agreement with the observations in the central zone of the flow and was a reasonable approximation of the depth-averaged concentration.

The Rouse number is the main parameter for the  $\alpha_\phi$  modeling. Variations in  $P_\phi$  during the hydrological cycle may be monitored from a few point concentration measurements or through the calibration of a relation between the  $u_*$  or  $h$  and the measured  $P_\phi$ . Alternatively, a function of  $w_\phi/u_*$  and  $h/d_s$  was proposed to compute  $\beta_\phi$  and predict  $P_\phi \pm 0.03$ .

The sensitivity of the  $\alpha_\phi$  model decreases from the boundaries to a zone between  $[0.2 h, 0.5 h]$ , which is based on the flow conditions. At the water surface, the model becomes inaccurate when  $P_s > 0.3$ , i.e., for flow conditions corresponding to sand suspension in the lowland. In such a context, sampling in the central zone of the flow is preferable for sand concentration monitoring. A pertinent sampling height for optimized concentration monitoring appears to be  $z_\chi = 0.37 h$ .

- 5 This insight into the hydraulic theory leads to enhanced sediment monitoring practices ~~that can with~~ a more accurate estimate of the sediment load, especially in regions with limited available data, such as the Amazonian basin. Indeed, the proposed model is a tool that can be used to predict ~~the ratios of  $\alpha_\phi$  and  $\alpha$  ratios~~ and can also be used to select a proper sampling height for optimized monitoring. Extensively, the model allows for detailed uncertainty analysis on the  $\langle C \rangle$  derived from an index method.
- 10 Finally, where the cross-section geometry is well known ~~and where no in situ concentration data exist~~, the model could allow for an accurate estimation of ~~the mean concentration in fine sediments  $\langle C_f \rangle$  with a remote sensing monitoring of the index concentration in fine sediments on the water surface~~. Coupling this monitoring with a sand transport model suitable for large rivers could ensure a better understanding of the sediment dynamics in the Amazonian basin.

### Data availability

- 15 The data that support the findings of this study are available from the following data-repository (Santini et al., 2018): <https://doi.org/10.6096/DV/CBUWTR>. Extra data (water levels, suspended concentration time series...) are also available from the corresponding author upon request and on the CZO HYBAM website: [www.so-hybam.org](http://www.so-hybam.org).

### Author contributions

- Conceptualization, data analysis, investigation, methodology and codes development: WS, BC, JLC, PV
- 20 - Manuscript preparation and data discussion; WS, BC, JLC, JMM, JLG
- Funding acquisition, project administration, supervision: JMM, JLG, WS, WL, MAP
- Hydrologic data acquisition: WS, PV, JC, JJPA, REV, JLG
- Laboratory analysis: NA, FJ, WS

- 25 **Competing interests.** The authors declare that they have no conflict of interest.

### Acknowledgements

This work has been funded by the French National Research Institute for Sustainable Development (IRD), the National Center for Scientific Research (CNRS - INSU) and the Peruvian Hydrologic and Meteorology Service (SENAMHI). The authors

would especially like to acknowledge all their colleagues of the National Agrarian University of La Molina (UNALM) and of the Functional Ecology and Environment laboratory (EcoLab) who contributed to the analysis of the data used in this study.

## References

- Aalto, R., Maurice-Bourgoin, L. and Dunne T.: Episodic sediment accumulation on Amazonian flood plains influenced by El Niño/Southern Oscillation, *Nature*, 425, 493–497, doi:10.1038/nature01990.1, 2003.
- 5 Aceituno, P.: On the Functioning of the Southern Oscillation in the South American Sector. Part I: Surface Climate, *Monthly Weather Review*, doi:10.1175/1520-0493(1988)116<0505:OTFOTS>2.0.CO;2, 1988.
- Ahrens, J. P.: The fall-velocity equation, *Journal of Waterway, Port, Coastal, and Ocean Engineering*, 126(2), 99–102, doi:10.1061/(ASCE)0733-950X(2000)126:2(99), 2000.
- 10 Armijos, E., Crave, A., Espinoza, R., Fraizy, P., Dos Santos, A. L. M. R., Sampaio, F., De Oliveira, E., Santini, W., Martinez, J. M., Autin, P., Pantoja, N. and Oliveira, M.: Measuring and modeling vertical gradients in suspended sediments in the Solimões/Amazon River, *Hydrological Processes*, 31(3), 654–667, doi:10.1002/hyp.11059, 2016.
- Armijos, E., Crave, A., Vauchel, P., Fraizy, P., Santini, W., Moquet, J. S., Arevalo, N., Carranza, J. and Guyot, J. L.: Suspended sediment dynamics in the Amazon River of Peru, *Journal of South American Earth Sciences*, 44, 75–84, doi:10.1016/j.jsames.2012.09.002, 2013.
- 15 Bartholdy, J., Flemming, B. W., Ernstsens, V. B., Winter, C. and Bartholomä, A.: Hydraulic roughness over simple sub-aqueous dunes, *Geo-Marine Letters*, 30(1), 63–76, doi:10.1007/s00367-009-0153-7, 2010.
- Bouchez, J., Métivier, F., Lupker, M., Maurice-Bourgoin, L., Perez, M., Gaillardet, J. and France-Lanord, C.: Prediction of depth-integrated fluxes of suspended sediment in the Amazon River: particle aggregation as a complicating factor, *Hydrological Processes*, 25(5), 778–794, doi:10.1002/hyp.7868, 2011.
- 20 Callède, J., Kosuth, P., Guyot, J. L. and Guimaraes, V. S.: Discharge determination by acoustic Doppler current profilers (ADCP): A moving bottom error correction method and its application on the River Amazon at Obidos, *Hydrological Sciences Journal*, 45(6), 911–924, doi:10.1080/02626660009492392, 2000.
- Castro-Orgaz, O., Girdlez, J. V., Mateos, L. and Dey, S., Is the von Karman constant affected by sediment suspension?, *Journal of Geophysical Research, Earth Surface*, 117(4), 1–16, doi:10.1029/2011JF002211, 2012.
- 25 Camenen, B.: Simple and general formula for the settling velocity of particles, *Journal of Hydraulic Engineering*, 133(2), 229–233, doi:10.1061/(ASCE)0733-9429(2007)133:2(229), 2007.
- Camenen, B. and Larson, M.: A general formula for non-cohesive bed load sediment transport, *Estuarine, Coastal and Shelf Science*, 63(1–2), 249–260, doi:10.1016/j.ecss.2004.10.019, 2005.
- 30 Camenen, B. and Larson, M.: A General Formula for Noncohesive Suspended Sediment Transport, *Journal of Coastal Research*, 243(2), 615–627, doi:10.2112/06-0694.1, 2008.



- Camenen, B., Le Coz, J., Dramais, G., Peteuil, C., Fretaud, T., Falgon, A., Dussouillez, P. and Moore, S. A.: A simple physically-based model for predicting sand transport dynamics in the Lower Mekong River, *River Flow*, 2189–2197, 2014.
- Cheng, N. S.: Simplified settling velocity formula for sediment particle, *Journal of hydraulic engineering*, 123(2), 149–152. doi:10.1061/(ASCE)0733-9429(1997)123:2(149), 1997.
- 5 Coleman, N. L.: Flume studies of the sediment transfer coefficient, *Water Resources Research*, 6(3), 801–809, doi:10.1061/(ASCE)0733-9429(1997)123:2(149), 1970.
- Curtis, W. F., Meade, R. H., Nordin, C. F., Price, N. B. and Sholkovitz, E. R.: Non-uniform vertical distribution of fine sediment in the Amazon River, *Nature*, 280(5721), 381–383, 1979.
- De Paiva, R. C. D., Buarque, D. C., Collischonn, W., Bonnet, M. P., Frappart, F., Calmant, S. and Bulhões Mendes, C. A.:
- 10 Large-scale hydrologic and hydrodynamic modeling of the Amazon River basin, *Water Resources Research*, 49(3), 1226–1243, doi:10.1002/wrcr.20067, 2013.
- Dos Santos, A. L. M. R., Martinez, J. M., Filizola, N., Armijos, E. and Alves, L. G. S.: Purus River suspended sediment variability and contributions to the Amazon River from satellite data (2000-2015), *Comptes Rendus Geoscience*, 350(1–2), 13–19, doi:10.1016/j.crte.2017.05.004, 2017.
- 15 Dunne, T., Meade, R. H., Richey, J. E. and Forsberg, B. R.: Exchanges of sediment between the flood plain and channel of the Amazon River in Brazil, *GSA Bulletin*, 110(4), 450–467, doi: 10.1130/0016-7606(1998)110<0450:EOSBTF>2.3.CO;2, 1998.
- Duvert, C., Gratiot, N., Némery, J., Burgos, A. and Navratil, O.: Sub-daily variability of suspended sediment fluxes in small mountainous catchments - implications for community- based river monitoring, *Hydrology and Earth System Sciences*, 15, 703–713, doi:10.5194/hess-15-703- 2011, 2011.
- 20 Englund, F. and Hansen, E.: *A Monograph on Sediment Transport in Alluvial Streams*, Tekniskforlag Technical Press, Copenhagen, 1967.
- Espinoza, J. C., Ronchail, J., Frappart, F., Lavado, W., Santini, W. and Guyot, J. L.: The Major Floods in the Amazonas River and Tributaries (Western Amazon Basin) during the 1970-2012 Period: A Focus on the 2012 Flood, *Journal of Hydrometeorology*, 14(3), 1000–1008, doi:10.1175/JHM-D-12-0100.1, 2013.
- 25 Espinoza, J. C., Ronchail, J., Guyot, J. L., Junquas, C., Drapeau, G., Martinez, J. M., Santini, W., Vauchel, P., Lavado, W., Ordoñez, J. and Espinoza-Villar, R.: From drought to flooding: understanding the abrupt 2010-11 hydrological annual cycle in the Amazonas River and tributaries, *Environmental Research Letters*, 7(2), 024008, doi:10.1088/1748-9326/7/2/024008, 2012.
- Espinoza-Villar, R., Martinez, J. M., Armijos, E., Espinoza, J. C., Filizola, N., Dos Santos, A., Willems, B., Fraizy, P., Santini, W. and Vauchel, P.: Spatio-temporal monitoring of suspended sediments in the Solimões River (2000-2014), *Comptes Rendus Geoscience*, 350(1–2), 4–12, doi:10.1016/j.crte.2017.05.001, 2017.
- 30 Espinoza-Villar, R., Martinez, J. M., Guyot, J. L., Fraizy, P., Armijos, E., Crave, A., Bazan, H., Vauchel, P. and Lavado, W.: The integration of field measurements and satellite observations to determine river solid loads in poorly monitored basins, *Journal of Hydrology*, 444, 221–228, doi:10.1016/j.jhydrol.2012.04.024, 2012.

- Espinoza-Villar, R., Martinez, J. M., Le Texier, M., Guyot, J. L., Fraizy, P., Meneses, P. R. and De Oliveira, E.: A study of sediment transport in the Madeira River, Brazil, using MODIS remote-sensing images, *Journal of South American Earth Sciences*, 44, 45–54, doi:10.1016/j.jsames.2012.11.006, 2013.
- Filizola, N.: Transfert sédimentaire actuel par les fleuves Amazoniens, PhD thesis, Université Paul Sabatier, Toulouse, France, 5 2003.
- Filizola, N. and Guyot, J. L.: The use of Doppler technology for suspended sediment discharge determination in the River Amazon, *Hydrological Sciences Journal*, 49(1), 143–154, doi:10.1623/hysj.49.1.143.53990, 2004.
- Filizola, N., Seyler, F., Mourão, M. H., Arruda, W., Spínola, N. and Guyot, J. L.: Study of the variability in suspended sediment discharge at Manacapuru, Amazon River, Brazil, *Latin American Journal of sedimentology and basin analysis*, 16(2), 93–99, 10 2010.
- Finer, M. and Jenkins, C. N.: Proliferation of Hydroelectric Dams in the Andean Amazon and Implications for Andes-Amazon Connectivity, *Plos one*, 7(4), e35126, doi:10.1371/journal.pone.0035126, 2012.
- Forsberg, B. R., Melack, J. M., Dunne, T., Barthem, R. B., Goulding, M., Paiva, R. C. D., Sorribas, M. V., Urbano, L. S J. and Weisser, S.: The potential impact of new Andean dams on Amazon fluvial ecosystems, *Plos One* 12(8), e0182254, 15 doi:10.1371/journal.pone.0182254, 2017.
- Garreaud, R. D., Vuille, M., Compagnucci, R. and Marengo, J.: Present-day South American climate, *Palaeogeography, Palaeoclimatology, Palaeoecology*, 281(3–4), 180–195, doi:10.1016/j.palaeo.2007.10.032, 2009.
- Gaudio, R., Miglio, A. and Dey, S.: Non-universality of von Kármán's  $\kappa$  in fluvial streams, *Journal of Hydraulic Research*, 48(5), 658–663, doi:10.1080/00221686.2010.507338, 2010.
- 20 Gitto, A. B., Venditti, J. G., Kostaschuk, R. and Church, M.: Representative point-integrated suspended sediment sampling in rivers, *Water Resources Research*, 53, 2956–2971, doi:10.1002/2016WR019742, 2017.
- Gloor, M., Brien, R. J. W., Galbraith, D., Feldpausch, T. R., Schöngart, J., Guyot, J. L., Espinoza, J. C., Lloyd, J. and Phillips, O. L.: Intensification of the Amazon hydrological cycle over the last two decades, *Geophysical Research Letters*, 40(9), 1729–1733, doi:10.1002/grl.50377, 2013.
- 25 Graf, W. H. and Cellino, M.: Suspension flows in open channels; experimental study, *Journal of Hydraulic Research*, 40(4), 435–447, doi:10.1080/00221680209499886, 2002.
- Gray, J. R. and Gartner, J. W.: Technological advances in suspended-sediment surrogate monitoring, *Water Resources Research*, 46(4), W00D29, doi:10.1029/2008WR007063, 2010.
- Gualtieri, C., Angeloudis, A., Bombardelli, F., Jha, S. and Strosser, T.: On the Values for the Turbulent Schmidt Number in Environmental Flows, *Fluids*, 2(2), 17, doi:10.3390/fluids2020017, 2017.
- 30 Gualtieri, C., Filizola, N., De Oliveira, M., Santos Martinelli, A. and Ianniruberto, M.: A field study of the confluence between Negro and Solimões Rivers. Part 1: Hydrodynamics and sediment transport, *Comptes Rendu Geoscience*, 350(1–2), 31–42, doi:10.1016/j.crte.2017.09.015, 2018.

- Guo, J. and Julien, P.: Application of the modified log-wake law in open-channels, *Journal of Applied Fluid Mechanics*, 1(2), 17–23, doi:10.1061/40856(200)200, 2008.
- Guyot, J. L., Bazan, H., Fraizy, P., Ordonez, J. J. and Armijos, E.: Suspended sediment yields in the Amazon basin of Peru: a first estimation, *IAHS*, 314(3), 1–8, 2007.
- 5 Guyot, J. L., Filizola, N. and Laraque, A.: Régime et bilan du flux sédimentaire de l'Amazonie à Óbidos (Pará, Brésil), de 1995 à 2003, *IAHS*, 291, 347–356, 2005.
- Horowitz, A. J.: An evaluation of sediment rating curves for estimating suspended sediment concentrations for subsequent flux calculations, *Hydrological Processes*, 17(17), 3387–3409, doi:10.1002/hyp.1299, 2003.
- Horowitz, A. J., Clarke, R. T. and Merten, G.H.: The effects of sample scheduling and sample numbers on estimates of the  
10 annual fluxes of suspended sediment in fluvial systems, *Hydrological Processes*, 29, 531–543, doi:10.1002/hyp.10172, 2015.
- Horowitz, A.J. and Elrick, K.A.: The relation of stream sediment surface area, grain size and composition to trace element chemistry, *Applied Geochemistry*, 2(4), 437–451, doi:10.1016/0883-2927(87)90027-8, 1987.
- Jiménez, J.A. and Madsen, O.S.: A Simple Formula to Estimate Settling Velocity of Natural Sediments, *Journal of Waterway, Port, Coastal and Ocean Engineering*, 129(2), 155–164, doi:10.1061/(ASCE)0733-950X(2003)129:2(70), 2003.
- 15 Kazemi, E., Nichols, A., Tait, S. and Shao, S.: SPH modelling of depth-limited turbulent open channel flows over rough boundaries, *International Journal for Numerical Methods in Fluids*, 83(1), 3–27, doi:10.1002/fld.4248, 2017.
- Laraque, A., Bernal, C., Bourrel, L., Darrozes, J., Christophoul, F., Armijos, E., Fraizy, P., Pombosa, R. and Guyot, J. L.: Sediment budget of the Napo River, Amazon basin, Ecuador and Peru, *Hydrological Processes*, 23, 3509–3524, doi:10.1002/hyp, 2009.
- 20 Latrubesse, E. M., Arima, E. Y., Dunne, T., Park, E., Baker, V. R., D'Horta, F. M., Wight, C., Wittmann, F., Zuanon, J., Baker, P. A., Ribas, C. C., Norgaard, R. B., Filizola, N., Ansar, A., Flyvbjerg, B. and Stevaux, J. C.: Damming the rivers of the Amazon basin, *Nature*, 546(7658), 363–369, doi:10.1038/nature22333, 2017.
- Lavado, W., Labat, D., Guyot, J. L. and Ardoin-Bardin, S.: Assessment of climate change impacts on the hydrology of the Peruvian Amazon-Andes basin, *Hydrological Processes*, 25(24), 3721–3734, doi:10.1002/hyp.8097, 2011.
- 25 Levesque, V. A. and Oberg, K. A.: Computing discharge using the index velocity method, *U.S. Geological Survey Techniques and Methods*, 3–A23, 2012.
- Lupker, M., France-Lanord, C., Lavé, J., Bouchez, J., Galy, V., Métivier, F., Gaillardet, J., Lartiges, B. and Mugnier, J. L.: A Rouse-based method to integrate the chemical composition of river sediments: Application to the Ganga basin, *Journal of Geophysical Research, Earth Surface*, 116(4), 1–24, doi:10.1029/2010JF001947, 2011.
- 30 Marengo, J. and Espinoza, J. C.: Extreme seasonal droughts and floods in Amazonia: causes, trends and impacts, *International Journal of Climatology*, 36, 1033–1050, doi:10.1002/joc.4420, 2015.
- Martinez, J. M., Espinoza-Villar, R., Armijos, E., Moreira, L. S.: The optical properties of river and floodplain waters in the Amazon River Basin: Implications for satellite-based measurements of suspended particulate matter, *Journal of Geophysical Research : Earth Surface*, 120(7), 1274–1287, doi:10.1002/2014JF003404, 2015.

- Martinez, J. M., Guyot, J. L., Filizol, N. and Sondag, F.: Increase in suspended sediment discharge of the Amazon River assessed by monitoring network and satellite data, *Catena* 79(3), 257–264, doi:10.1016/j.catena.2009.05.011, 2009.
- Masson, M., Angot, H., Le Bescond, C., Launay, M., Dabrin, A., Miège, C., Le Coz, J. and Coquery, M.: Sampling of suspended particulate matter using particle traps in the Rhône River: Relevance and representativeness for the monitoring of contaminants, *Science of the Total Environment*, 637–638, 538–549, doi:10.1016/j.scitotenv.2018.04.343, 2018.
- 5 Mertes, L. A., Smith, C. T. and Adams, J. B.: Estimating Suspended Sediment Concentrations in Surface Waters of the Amazon River Wetlands from Landsat Images, *Remote Sensing of Environment*, 43(3), 281–301, doi:10.1016/0034-4257(93)90071-5, 1993.
- Molina-Carpio, J., Espinoza, J. C., Vauchel, P., Ronchail, J., Gutierrez Caloir, B., Guyot, J. L. and Noriega, L.: Hydroclimatology of the Upper Madeira River basin: spatio-temporal variability and trends, *Hydrological Sciences Journal*, 10 62(6), 911–927, doi:10.1080/02626667.2016.1267861, 2017.
- Molinas, A. and Wu, B.: Transport of sediment in large sand-bed rivers, *Journal of Hydraulic Research* 39(2), 135–146, doi:10.1080/00221680109499814, 2001.
- Moquet, J. S., Crave, A., Viers, J., Seyler, P., Armijos, E., Bourrel, L., Chavarri, E., Lagane, C., Laraque, A., Lavado, W., 15 Pombosa, R., Noriega, L., Vera, A. and Guyot, J. L.: Chemical weathering and atmospheric/soil CO<sub>2</sub> uptake in the Andean and Foreland Amazon basins, *Chemical Geology*, 287(1–2), 1–26, doi:10.1016/j.chemgeo.2011.01.005, 2011.
- O’Brien, M. P.: Review of the Theory of turbulent flow and its relation to sediment-transportation, *Transaction American Geophysical Union*, 14, 487–491, 1933.
- 20 [Pal, D. and Ghoshal, K.: Vertical distribution of fluid velocity and suspended sediment in open channel turbulent flow. \*Fluid Dynamics Research\*, 48\(3\), 035501, doi:10.1088/0169-5983/48/3/035501, 2016](#)
- Paris, A., Dias de Paiva, R., Santos da Silva, J., Medeiros Moreira, D., Calmant, S., Garambois, P. A., Collischonn, W., Bonnet, M. P. and Seyler, F.: Stage-discharge rating curves based on satellite altimetry and modeled discharge in the Amazon basin, *Water Resources Research*, 52(5), 3787–3814, doi:10.1002/2014WR016618, 2016.
- Park, E. and Latrubesse, E. M.: Modeling suspended sediment distribution patterns of the Amazon River using MODIS data, 25 *Remote Sensing of Environment*, 147, 232–242, doi:10.1016/j.rse.2014.03.013, 2014.
- Pinet, S., Martinez, J. M., Ouillon, S., Lartiges, B. and Espinoza-Villar, R.: Variability of apparent and inherent optical properties of sediment-laden waters in large river basins - lessons from in situ measurements and bio-optical modeling, *Optics Express*, 25(8), A283, doi:10.1364/OE.25.00A283, 2017.
- Ronchail, J., Cochonneau, G., Moliner, M., Guyot, J. L., De Miranda Chaves, A. G., Guimarães, V. S. and De Oliveira, E.: 30 Interannual rainfall variability in the Amazon basin and sea-surface temperatures in the equatorial Pacific and the tropical Atlantic Oceans, *International Journal of Climatology*, 22(13), 1663–1686, doi:10.1002/joc.815, 2002.
- Ronchail, J. and Gallaire, R.: ENSO and rainfall along the Zongo valley (Bolivia) from the Altiplano to the Amazon basin, *International Journal of Climatology*, 26(9), 1223–1236, doi:10.1002/joc.1296, 2006.

- Rose, C. P. and Thorne, P. D.: Measurements of suspended sediment transport parameters in a tidal estuary, *Continental Shelf Research*, 21(15), 1551–1575, doi:10.1016/S0278-4343(00)00087-X, 2001.
- Rouse, H.: Modern conceptions of the mechanics of turbulence, *Transaction of the ASCE*, 102, 463–505, 1937.
- Santini, W., Martinez, J. M., Espinoza-Villar, R., Cochonneau, G., Vauchel, P., Moquet, J. S., Baby, P., Espinoza, J. C.,  
5 Lavado, W., Carranza, J. and Guyot, J. L.: Sediment budget in the Ucayali River basin, an Andean tributary of the Amazon River, *IAHS*, 367, 320–325, doi:10.5194/piahs-367-320-2015, 2014.
- Santini, W., Martinez, J. M., Vauchel, P., Guyot, J. L., Cochonneau, G.; Lavado, W., Carranza, J., Paredes, M. A., Pérez Arévalo, J., Espinoza-Villar, R., Arévalo, N., Arévalo, K.: Hydro-sedimentary data collected between 2010 and 2017 within the framework of the Critical Zone Observatory HYBAM in the Amazonian foreland of Peru, *SEDOO OMP*,  
10 <https://doi.org/10.6096/DV/CBUWTR>, 2018.
- Schmidt, W.: Der Massenaustausch in Freien Luft und Verwandte Erscheinungen, *Probleme der Kosmischen Physik*, 7, 1925.
- Sime, L. C., Ferguson, R. I. and Church, M.: Estimating shear stress from moving boat acoustic Doppler velocity measurements in a large gravel bed river, *Water Resources Research*, 43(3), 1–12, doi:10.1029/2006WR005069, 2007.
- Soulsby, R.: *Dynamics of Marine Sands, a Manual for Practical Applications*, Thomas Telford, London, 1997.
- 15 Syvitski, J. P. M., Vörösmarty, C. J., Kettner, A. J. and Green, P.: Impact of humans on the flux of terrestrial sediment to the global coastal ocean. *Science*, 308(5720), 376–380, doi:10.1126/science.1109454, 2005.
- Trigg, M., Wilson, M. D., Bates, P. D., Horritt, M. S., Alsdorf, D. E., Forsberg, B. R. and Vega, M. C.: Amazon flood wave hydraulics, *Journal of Hydrology*, 374(1–2), 92–105, doi:10.1016/j.jhydrol.2009.06.004, 2009.
- Vanoni, V. A.: *Sediment studies in the Brazilian Amazon River basin*, World Meteorological Organization, Geneva,  
20 Switzerland, 1979.
- Vanoni, V. A.: *Sediment studies in the Brazilian Amazon River basin*, Report KH-P-168, W.M. Keck Laboratory of Hydraulic and Water Resources, 1980.
- Van Rijn, L.: Sediment transport, part II: suspended load transport, *Journal of the Hydraulics Division*, 110(11), 1613–1641, doi:10.1061/(ASCE)0733-9429(1984)110:11(1613), 1984.
- 25 Vauchel, P., Santini, W., Guyot, J. L., Moquet, J. S., Martinez, J. M., Espinoza, J. C., Baby, P., Fuertes, O., Noriega, L., Puita, O., Sondag, F., Fraizy, P., Armijos, E., Cochonneau, G., Timouk, F., De Oliveira, E., Filizola, N., Molina, J. and Ronchail, J.: A reassessment of the suspended sediment load in the Madeira River basin from the Andes of Peru and Bolivia to the Amazon River in Brazil, based on 10 years of data from the HYBAM monitoring programme, *Journal of Hydrology*, 553, 35–48, doi:10.1016/j.jhydrol.2017.07.018, 2017.
- 30 Walling, D. E.: The sediment delivery problem, *Journal of Hydrology*, 65(1–3), 209–237, doi:10.1016/0022-1694(83)90217-2, 1983.
- Walling, D. E., Fang, D.: Recent trends in the suspended sediment loads of the world's rivers. *Global and Planetary Change*, 39(1–2), 111–126, doi:10.1016/S0921-8181(03)00020-1, 2003

Walling, D. E.: Human impact on land-ocean sediment transfer by the world's rivers, *Geomorphology*, 79(3–4), 192–216, doi:10.1016/j.geomorph.2006.06.019, 2006.

Wentworth, C. K.: A Scale of Grade and Class Terms for Clastic Sediments, *The Journal of Geology*, 30(5), 377–392, doi:10.1525/tph.2001.23.2.29, 1922.

5 Xiaoqing, B. Y.: Manual on sediment management and measurement, World Meteorological Organization Operational Hydrology Report, 47, Geneva, 2003.

Yen, B. C.: Open channel flow resistance, *Journal of Hydraulic Engineering*, 128(1), 20–39, doi:10.1061/(Asce)0733-9429(2002)128:1(20), 2002.

10 Yuill, B. T. and Gasparini, N. M.: Hydrologic controls on wash load sediment concentrations within a low-ordered, ephemeral watershed, *Journal of Hydrology*, 410(1–2), 73–83, doi:10.1016/j.jhydrol.2011.09.011, 2011.

Zagustin, K.: Sediment distribution in turbulent flow, *Journal of Hydraulic Research*, 6(2), 163–172, doi:10.1080/00221686809500227, 1968.

Zanke, U.: Berechnung der Sinkgeschwindigkeiten von sedimenten, *Mitt. des Franzius-Instituts für Wasserbau*, 46, 243, Technical University, Hannover, Germany, 1977.

15

| Station code  | Site        | River    | Basin area (km <sup>2</sup> ) | Mean discharge (m <sup>3</sup> s <sup>-1</sup> ) | Period considered | Number of samples | Number of concentration profiles | Suspended sediment concentration ranges (mg L <sup>-1</sup> ) |          | Particle size distribution |                       |
|---------------|-------------|----------|-------------------------------|--------------------------------------------------|-------------------|-------------------|----------------------------------|---------------------------------------------------------------|----------|----------------------------|-----------------------|
|               |             |          |                               |                                                  |                   |                   |                                  | Clay & silt                                                   | Sands    | Number of PSD profiles     | Number of PSD samples |
| LAG           | Lagarto     | Ucayali  | 191000                        | 6700                                             | 2011-2017         | 142               | 27                               | 9 - 1340                                                      | 1 - 3700 | 2                          | 10                    |
| PIN           | Puerto Inca | Pachitea | 22000                         | 2100                                             | 2012-2015         | 105               | 27                               | 180 - 1600                                                    | 6 - 2800 | 0                          | 1                     |
| REQ           | Requena     | Ucayali  | 347000                        | 12100                                            | 2010-2015         | 213               | 36                               | 110 - 1600                                                    | 5 - 2300 | 4                          | 25                    |
| BOR           | Borja       | Marañon  | 115000                        | 5200                                             | 2010-2015         | 130               | 27                               | 40 - 1250                                                     | 2 - 3400 | 2                          | 8                     |
| CHA           | Chazuta     | Huallaga | 69000                         | 3200                                             | 2010-2015         | 141               | 27                               | 60 - 1450                                                     | 5 - 2330 | 0                          | 0                     |
| REG           | San Regis   | Marañon  | 362000                        | 18000                                            | 2010-2015         | 226               | 39                               | 60 - 600                                                      | 5 - 1600 | 3                          | 16                    |
| TAM           | Tamshiyacu  | Amazonas | 720000                        | 30300                                            | 2010-2015         | 223               | 39                               | 60 - 960                                                      | 1 - 1600 | 2                          | 21                    |
| BEL           | Bellavista  | Napo     | 100000                        | 7400                                             | 2010-2015         | 150               | 27                               | 40 - 340                                                      | 4 - 830  | 1                          | 7                     |
| Table summary | 8           | Amazonas | 820000                        | 37700                                            | 2010-2017         | 1330              | 249                              | 9 - 1600                                                      | 1 - 3700 | 14                         | 88                    |

**Table 1:** Hydrologic and sample dataset for the 8 sampling stations.

| Station code | Mean results for the fine particle fraction |                            |                          |                           |                          |                                |                   |                               |                                    |                           | Mean results for the sand fraction |                                |                   |                               |                                    |
|--------------|---------------------------------------------|----------------------------|--------------------------|---------------------------|--------------------------|--------------------------------|-------------------|-------------------------------|------------------------------------|---------------------------|------------------------------------|--------------------------------|-------------------|-------------------------------|------------------------------------|
|              | $R_b$<br>(m)                                | $u_*$<br>( $m\ s^{-1}$ )   | $X_s$<br>$z_{index} = h$ | $d_f$ ( $\mu m$ )         | $w_f$<br>( $m\ s^{-1}$ ) | $P_f$                          | $\beta_f$         | $\alpha_f$<br>$z_{index} = h$ | $\alpha_f$<br>$z_{index} = 0.5\ h$ | $d_s$ ( $\mu m$ )         | $w_s$<br>( $m\ s^{-1}$ )           | $P_s$                          | $\beta_s$         | $\alpha_s$<br>$z_{index} = h$ | $\alpha_s$<br>$z_{index} = 0.5\ h$ |
| LAG          | 6.8                                         | 0.10                       | 15%                      | 16 ± 3%                   | 2.5E-04                  | 0.03 ± 16%                     | 0.21              | 1.1                           | 1.0                                | 148 ± 04%                 | 1.8E-02                            | 0.27 ± 09%                     | 1.7               | 3.5                           | 1.1                                |
| PIN          | 7.2                                         | 0.14                       | 20%                      | 14 ± 3%                   | 1.9E-04                  | 0.01 ± 14%                     | 0.24              | 1.0                           | 1.0                                | 124 ± 02%                 | 1.4E-02                            | 0.23 ± 12%                     | 1.1               | 2.3                           | 1.0                                |
| REQ          | 12.5                                        | 0.09                       | 7%                       | 16 ± 4%                   | 2.5E-04                  | 0.05 ± 08%                     | 0.14              | 1.2                           | 1.0                                | 114 ± 07%                 | 1.2E-02                            | 0.39 ± 07%                     | 0.8               | 6.4                           | 1.2                                |
| BOR          | 7.9                                         | 0.17                       | 10%                      | 16 ± 4%                   | 2.5E-04                  | 0.02 ± 17%                     | 0.17              | 1.0                           | 1.0                                | 118 ± 10%                 | 1.3E-02                            | 0.28 ± 16%                     | 0.6               | 4.3                           | 1.1                                |
| CHA          | 7.4                                         | 0.20                       | 16%                      |                           |                          | 0.01 ± 19%                     |                   | 1.1                           | 1.0                                |                           |                                    | 0.24 ± 07%                     |                   | 2.6                           | 1.0                                |
| REG          | 16.7                                        | 0.14                       | 14%                      | 15 ± 3%                   | 2.2E-04                  | 0.07 ± 10%                     | 0.06              | 1.4                           | 1.0                                | 132 ± 07%                 | 1.4E-02                            | 0.44 ± 05%                     | 0.6               | 7.5                           | 1.2                                |
| TAM          | 18.6                                        | 0.12                       | 6%                       | 17 ± 4%                   | 2.8E-04                  | 0.08 ± 14%                     | 0.07              | 1.5                           | 1.0                                | 141 ± 10%                 | 1.7E-02                            | 0.44 ± 05%                     | 0.8               | 8.0                           | 1.2                                |
| BEL          | 10.1                                        | 0.10                       | 17%                      | 19 ± 2%                   | 2.5E-04                  | 0.04 ± 16%                     | 0.15              | 1.2                           | 1.0                                | 192 ± 19%                 | 2.8E-02                            | 0.32 ± 08%                     | 2.1               | 4.3                           | 1.2                                |
| Mean         | 10.9                                        | 0.13                       | 13%                      | 16                        | 2.4E-04                  | 0.04                           | 0.16              | 1.2                           | 1.0                                | 138                       | 1.6E-02                            | 0.33                           | 1.1               | 4.8                           | 1.1                                |
| Method       | Measured                                    | Fitted on $u(z)$ (Log-law) | Measured                 | Derived from measured PSD | Soulsby law              | Fitted on $C(z)$ (Rouse model) | $w_f/(P_s k u_*)$ | Fitted on obs.                | Fitted on obs.                     | Derived from measured PSD | Soulsby law                        | Fitted on $C(z)$ (Rouse model) | $w_s/(P_s k u_*)$ | Fitted on obs.                | Fitted on obs.                     |

**Table 2:** Summary of suspended sediment transport parameters for each site and size group.

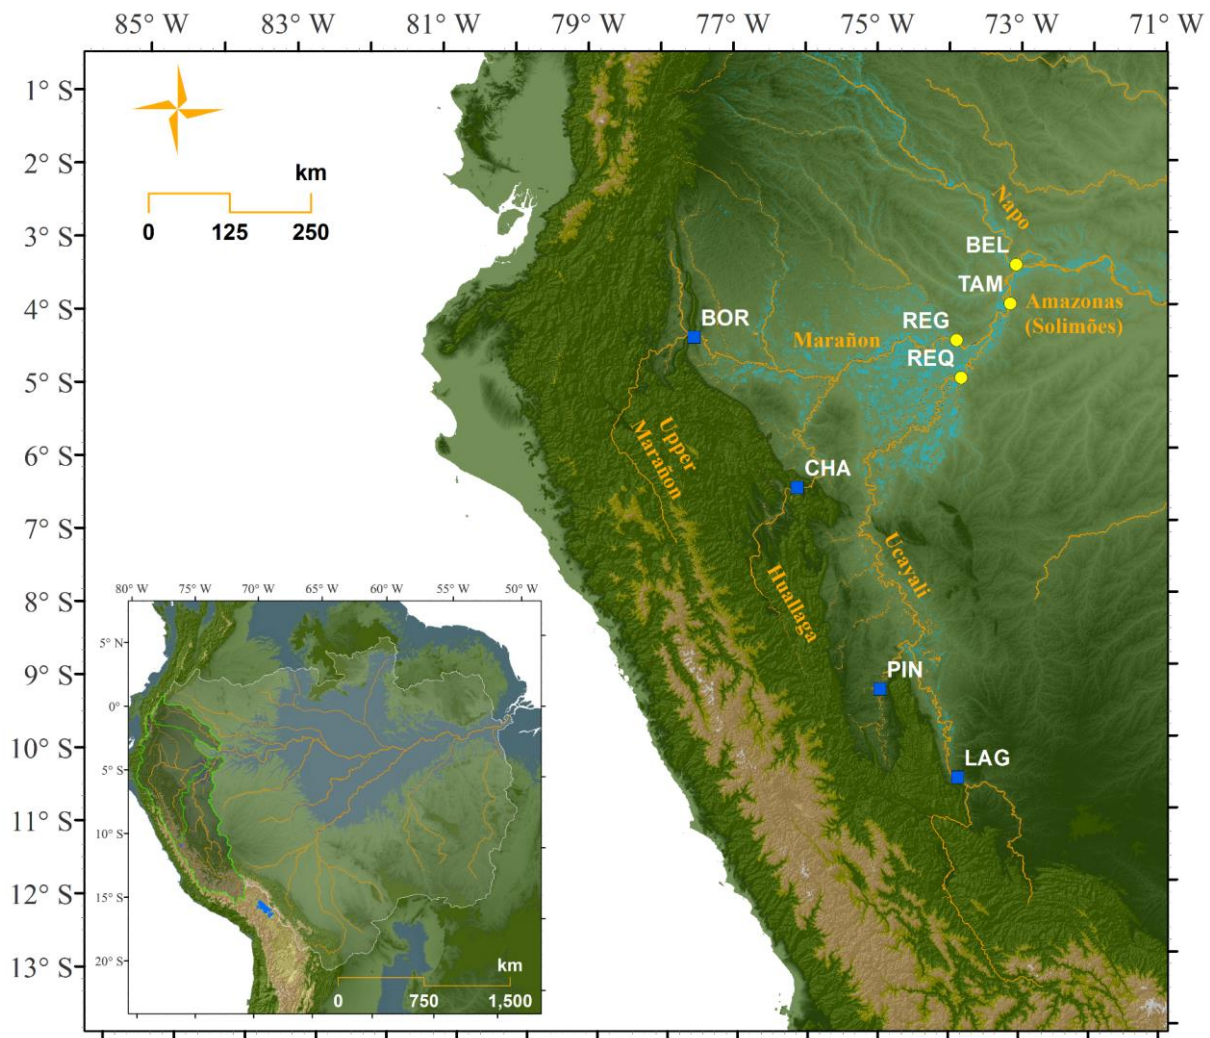

**Figure 1:** Location of the sampling sites in the Amazonian basin. Blue squares: Piedmont gauging stations; yellow dots: lowland gauging stations. In cyan: flooded areas.



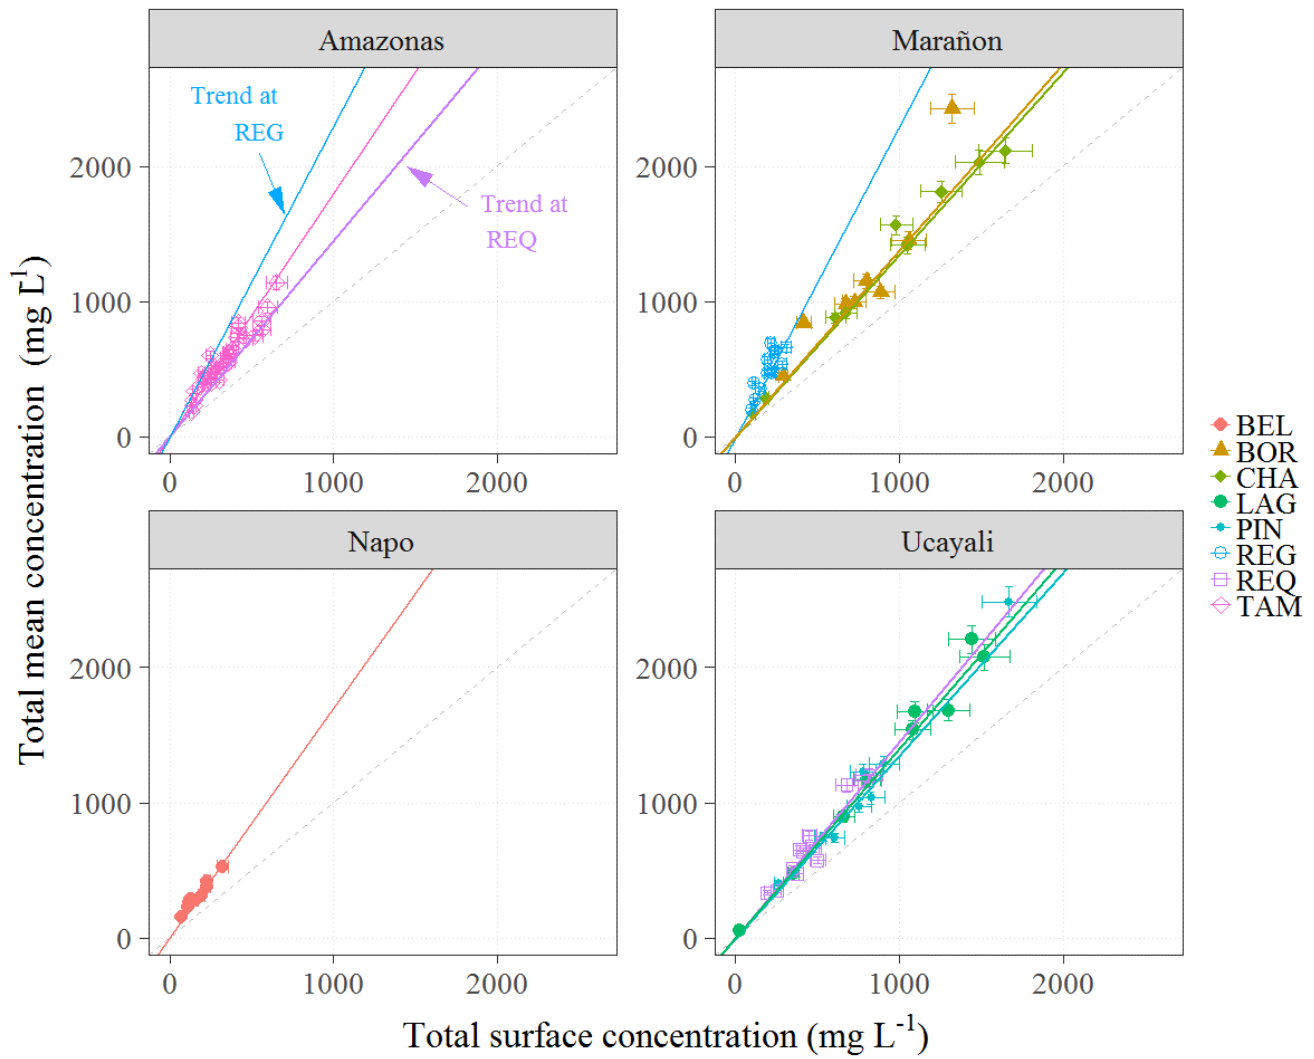

**Figure 2:** Measured-Observed ratios  $\alpha = (C)/C(h)$  of total mean concentration to the total surface concentration, stacked by river basin, with trend lines. For the Amazonas River basin at TAM (upper-left panel), the REG and REQ trend lines were reported. Dashed lines: first bisector.

5

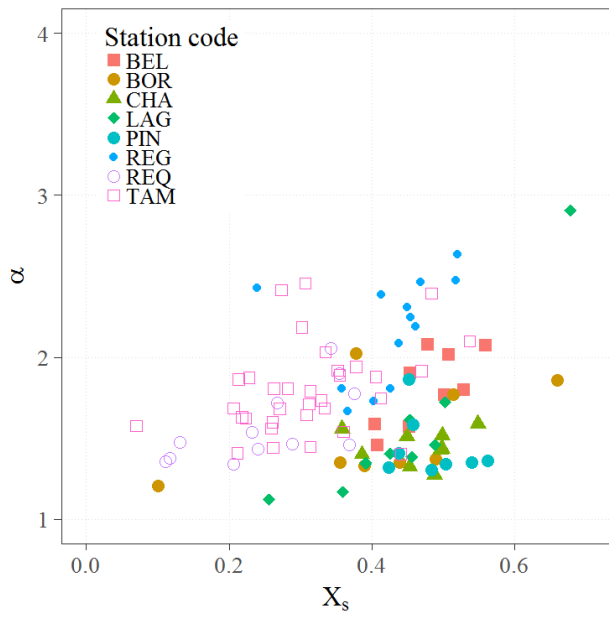

**Figure 3:** Observed ratios  $\alpha = \langle C \rangle / C(h)$  of total mean concentration to the total index concentration sampled at the water surface vs sand mass fraction  $X_s$ .

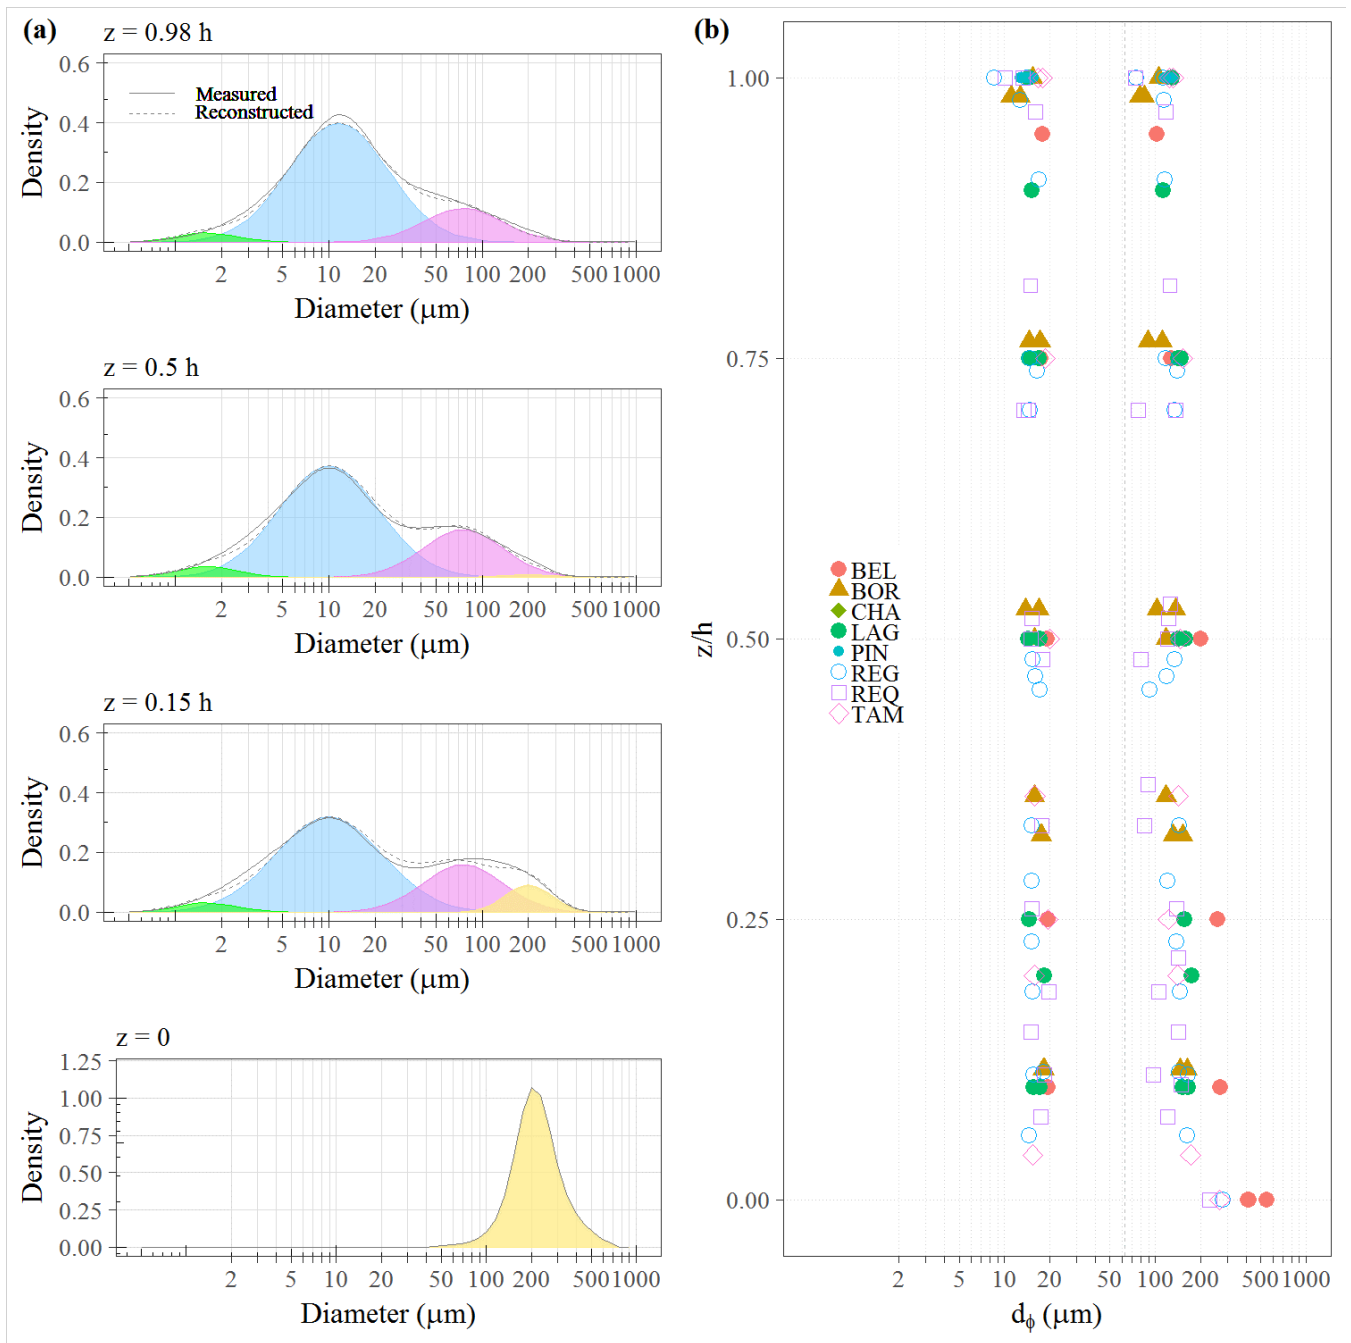

**Figure 4:** (a) Multimodal modeling of a typical PSD vertical profile. Gray lines: PSD measured at the Requena gauge station (03-16-2015) on the Ucayali River. Sampling depths are mentioned in the subtitles. Green, blue, pink and yellow correspond roughly to the following particle size groups: clays, silts and flocculi, very fine sands – fine sands, and bed material, respectively. The dashed gray line is the sum of the sub-distributions. (b) Particle diameters  $d_\phi$  measured at the 8 sampling stations for the fine and sand fractions.

5

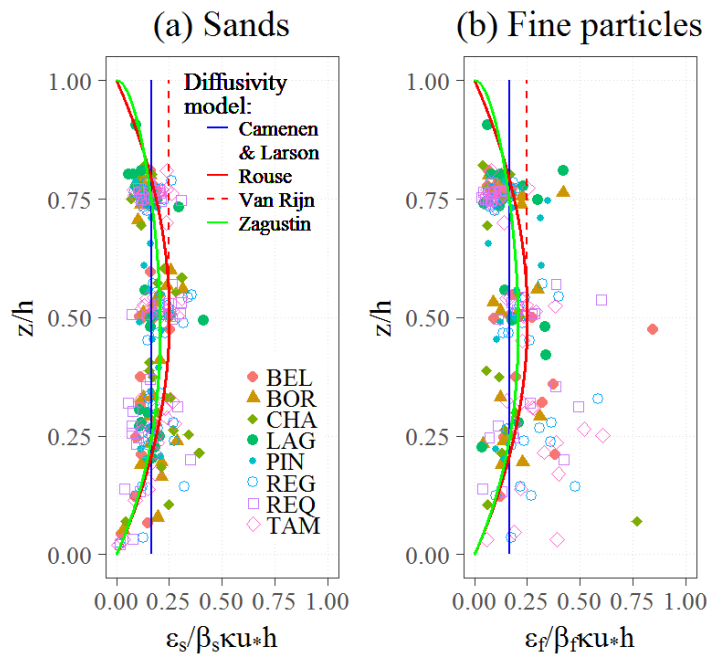

Figure 5: Dimensionless sediment diffusivity values-coefficient derived from the measured concentration profiles.

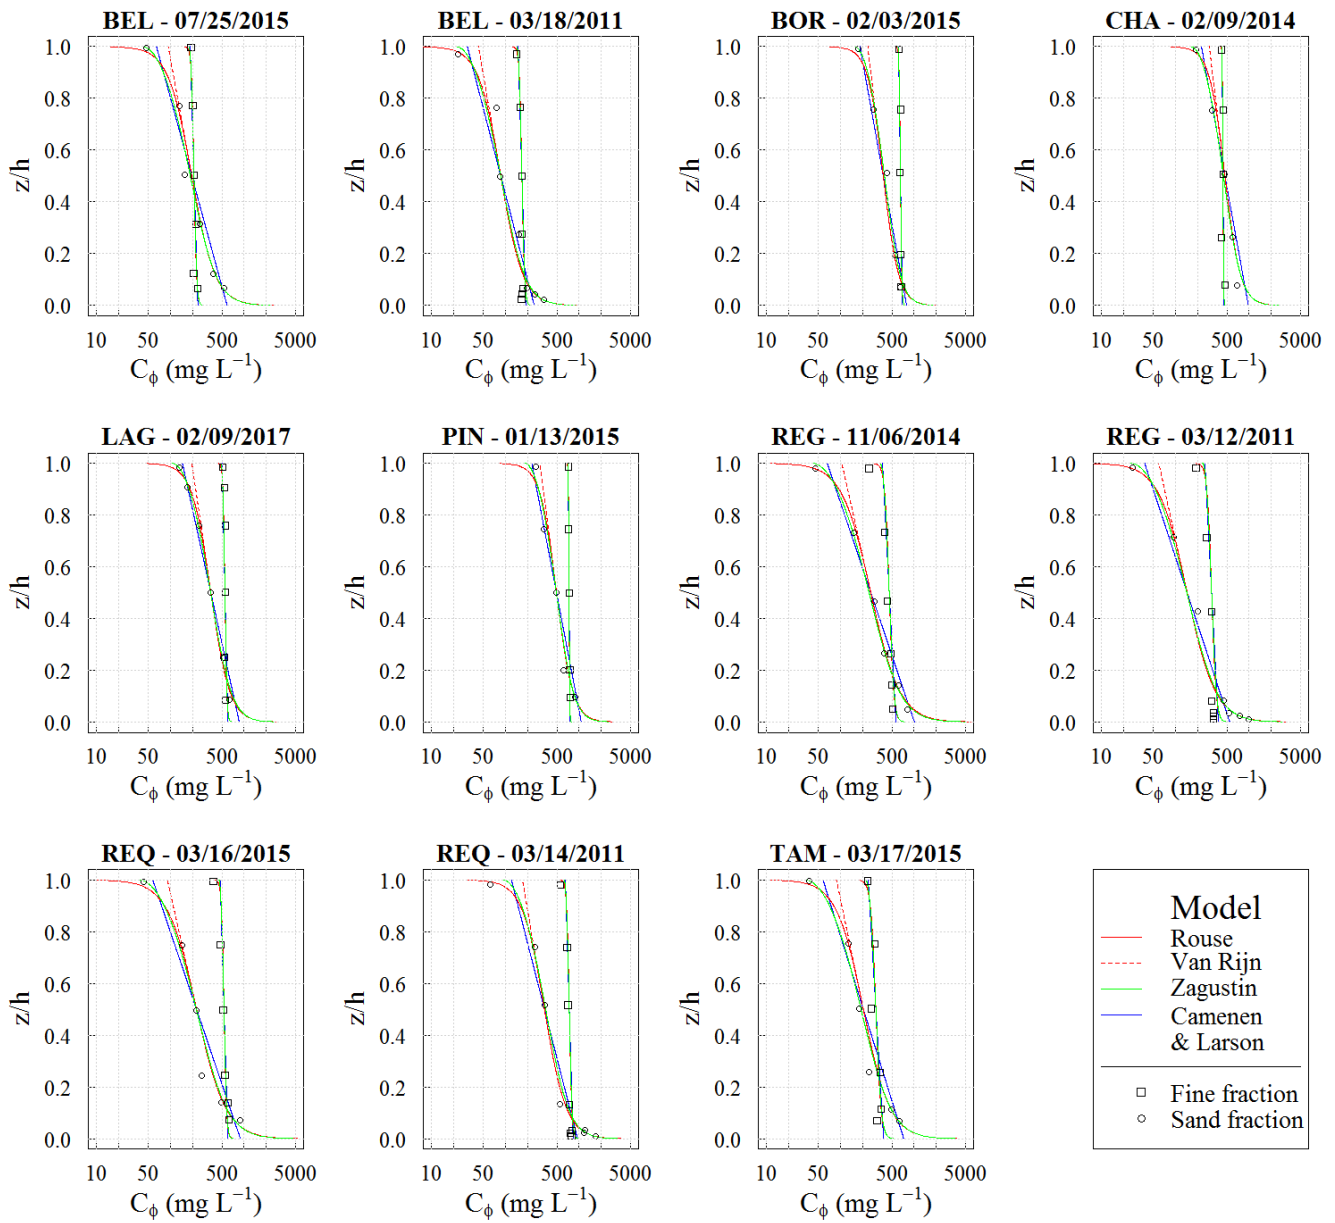

**Figure 6:** Typical examples of measured concentration profiles  $C_\phi(z/h)$ , fitted with the Rouse, Van Rijn, Zagustin and Camenen and Larson models.

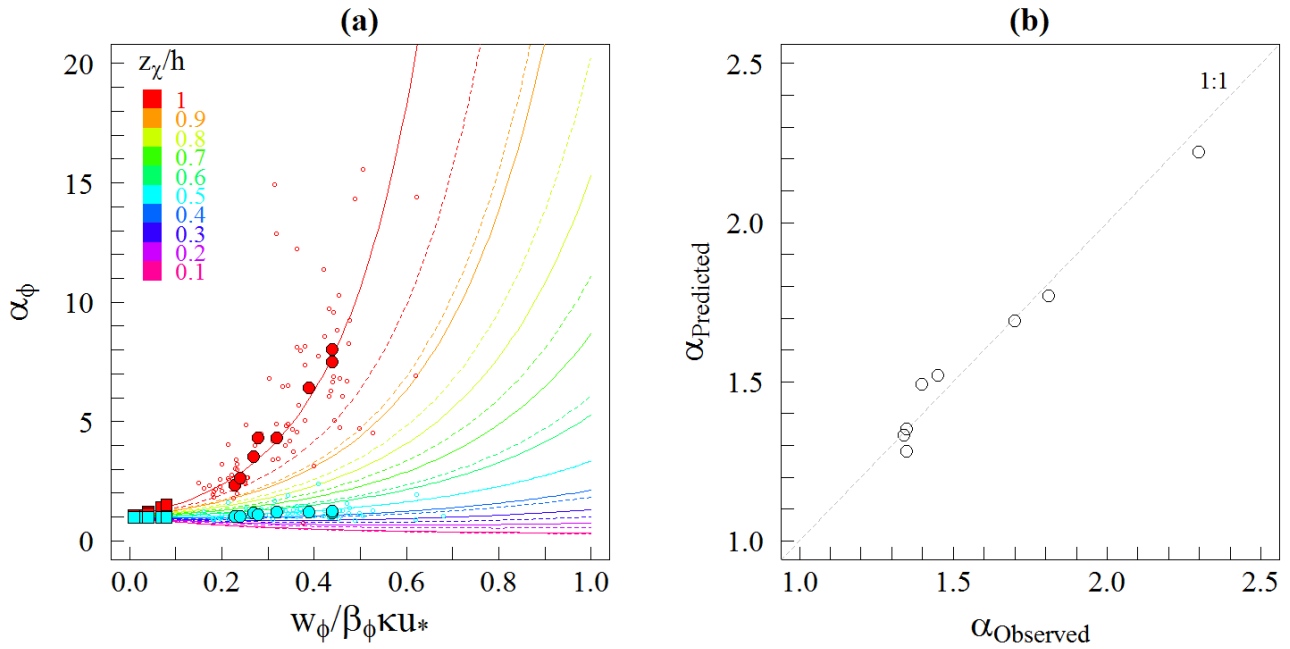

**Figure 7:** (a) Predicted and observed  $\alpha_\phi$  ratios as a function of the Rouse number. Filled circles and squares are the mean  $\alpha_\phi$  values observed per site for the sand and fine mass fractions, respectively. Unfilled circles: measured-observed  $\alpha_s$  values. The red to pink rainbow set of solid lines correspond to the general model prediction (Eq. 17), and each represents 10% of the water height. Dashed lines are for the simplified model (Eq. 18). (b) Predicted vs. observed mean  $\alpha$  ratios per site (i.e., total concentration).

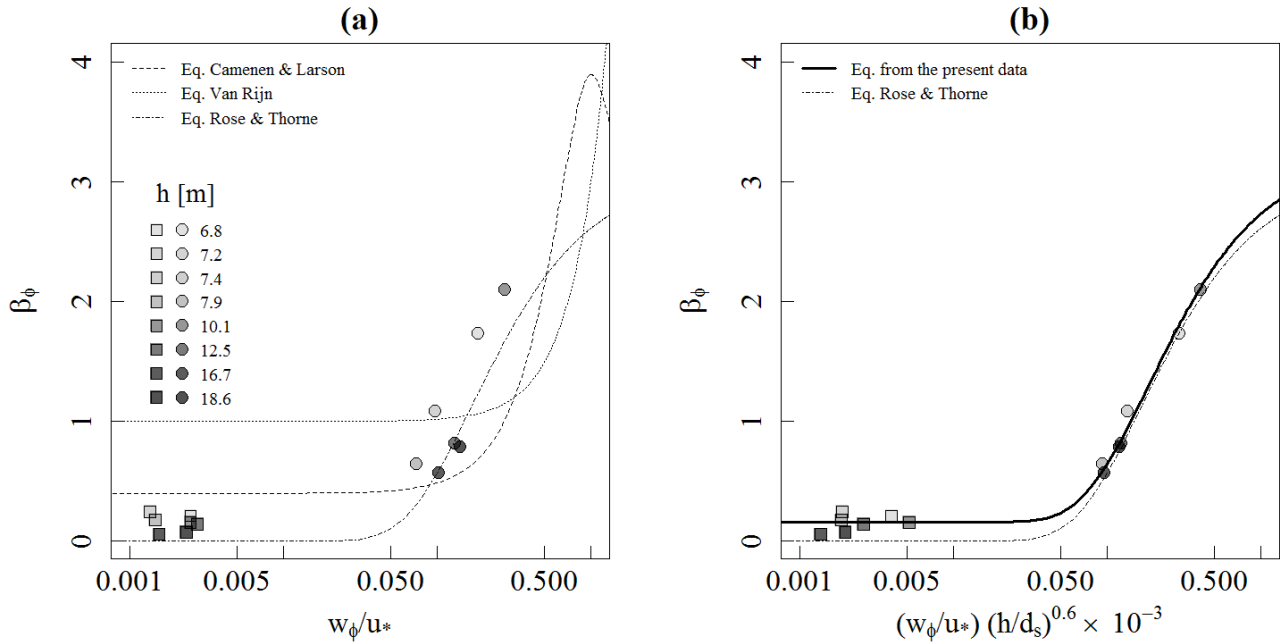

**Figure 8:** (a) Ratio of sediment to eddy diffusivity  $\beta_\phi$  factor as a function of the ratio  $w_\phi/u_*$  with points shaded according to the water level  $h$ . (b) Idem, after correction of the ratio ( $w_\phi/u_*$ ). Circles and squares are the mean values of  $\beta_s$  and  $\beta_f$  calculated per site, respectively.

5

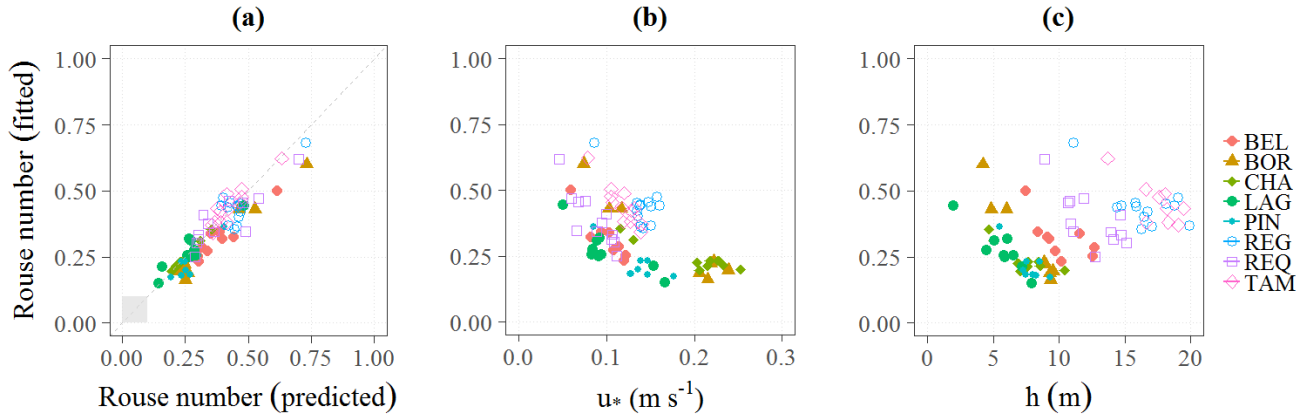

**Figure 9:** Fitted Rouse numbers against: (a) Predicted  $P_s$  (the gray square in the bottom-left represents the range of variation of  $P_f$ ) (b) Shear velocities (c) Water levels.

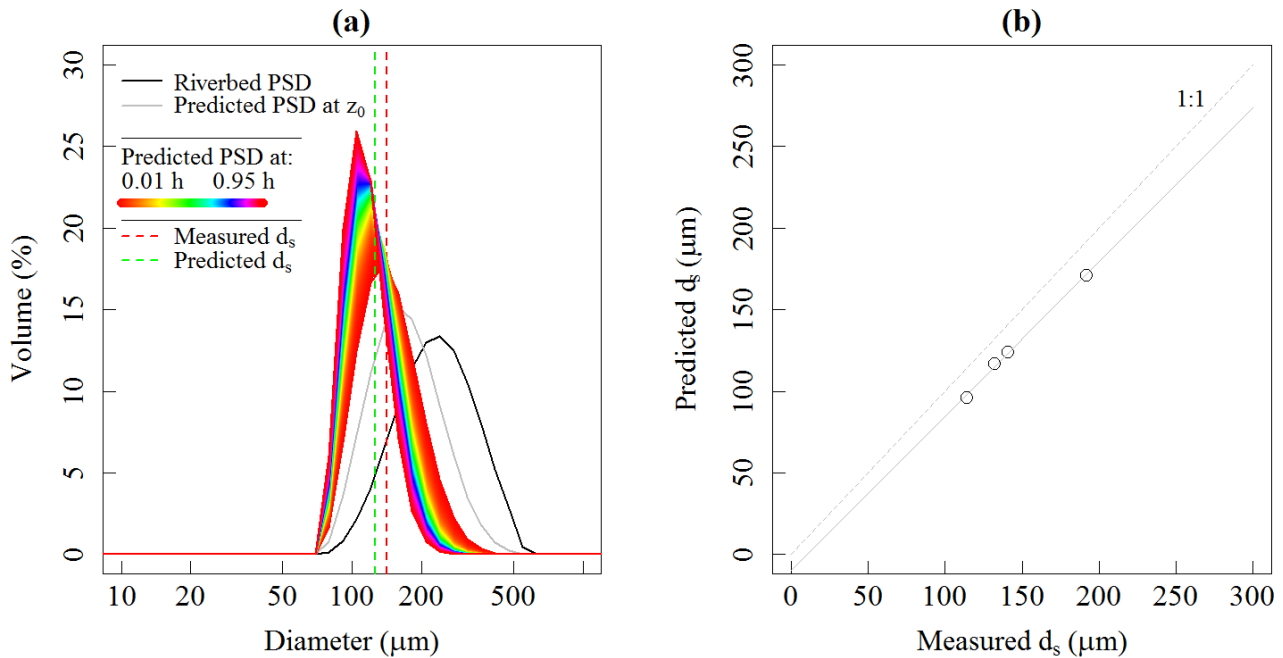

**Figure 10:** (a) Prediction of the mean diameter  $d_s$ ,  $d_{\bar{x}}$  at the TAM gauging station for  $u_* = 0.12 \text{ m s}^{-1}$  (mean flow conditions) (b) Predicted vs measured  $d_s$  at BEL, REQ, REG and TAM. Dashed line: first bisector. Continue line: best fit.

10

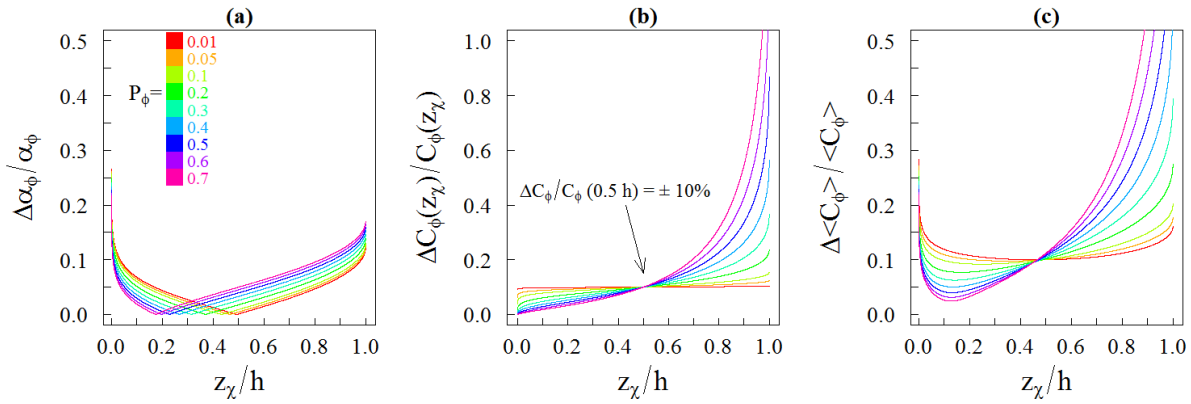

**Figure 11:** (a) Relative error of the predicted  $\alpha_\phi$  according to the relative height  $z_\chi/h$  of the index sampling, for various Rouse numbers  $P_\phi$ . (b) Relative error of the concentration sampled, inferred from the Zagustin model and assuming  $\frac{\Delta C_\phi}{C_\phi}(z_\chi = 0.5 h) = \pm 10\%$ . (c) Relative error on  $\langle C_\phi \rangle$  as a function of  $z_\chi/h$ .

## Appendices

### A1: List of notations

$f$  = Fine sediment particles group ( $0.45 \mu\text{m} < d_f < 63 \mu\text{m}$ )

$s$  = Sand sediment group ( $d_s > 63 \mu\text{m}$ )

10  $C$  = Time-averaged Concentration [ $\text{mg L}^{-1}$ ]

$d$  = Arithmetic mean diameter [m]

$$d_* = d \left( \frac{g(\rho_p - \rho_w)}{v_*^2} \right)^{\frac{1}{3}} = \text{dimensionless grain size}$$

$g$  = gravitational force [ $\text{m s}^{-2}$ ]

$h$  = Mean water depth [m]

15  $k_s$  = Nikuradse equivalent roughness height [m]

$P$  = Rouse number [-]

$q_s$  = Time-averaged sediment discharge on a vertical [ $\text{g s}^{-1} \text{m}^{-2}$ ]

$u$  = Time-averaged velocity [ $\text{m s}^{-1}$ ]

$u_*$  = Shear velocity [ $\text{m s}^{-1}$ ]

20  $w$  = Suspended sediment particle settling velocity [ $\text{m s}^{-1}$ ]

$X$  = Mass fraction [-]

$z$  = Height above the bed [m]



$\alpha$  = Ratio between mean concentration and index concentration [-]

$\beta$  = Ratio of sediment to eddy diffusivity [-]

$\varepsilon$  = Sediment diffusivity coefficient [ $\text{m}^2 \text{s}^{-1}$ ]

$\varepsilon_m$  = Momentum exchange coefficient [ $\text{m}^2 \text{s}^{-1}$ ]

5  $\kappa$  = Constant of Von Kármán [-]

$\nu$  = Kinematic viscosity [ $\text{m}^2 \text{s}^{-1}$ ]

$\rho_w$  = Water density [ $\text{kg m}^{-3}$ ]

$\rho$  = Sediment density [ $\text{kg m}^{-3}$ ]

$\theta$  = Shield's dimensionless shear stress parameter [-]

10  $\theta_{cr}$  = Critical dimensionless shear stress threshold [-]

$\langle \quad \rangle$  = Depth-integrated value

### Main subscripts

$\cdot\chi$  = Index height value

15  $\cdot_0$  = Bottom reference height value

$\cdot_r$  = Reference height value

$\cdot\phi$  = Particle size group  $\phi$ :

### A2: Soulsby (1997) settling law (terminal velocity):

20 
$$w = \frac{v}{d} \left( \sqrt{10.36^2 + 1.049 d_*^3} - 10.36 \right)$$

### A3: Velocity laws:

#### Inner law ("law of the wall"):

$$u(z) = \frac{u_*}{\kappa} \ln \left( \frac{30 z}{k_s} \right)$$

#### Zagustin (1968) defect law

25 
$$u(z) = U_{max} - 2 \times \frac{u_*}{\kappa} \operatorname{arctanh} \left( \frac{h-z}{h} \right)^{\frac{3}{2}}$$
